# Supplementary material for: Cryosphere Services to Support SDGs in High Mountains
Source: MDPI journal article supplement (doi:10.3390/su14020791), 2022-01-11
Supplement: s1 [file s1]

Supplement:

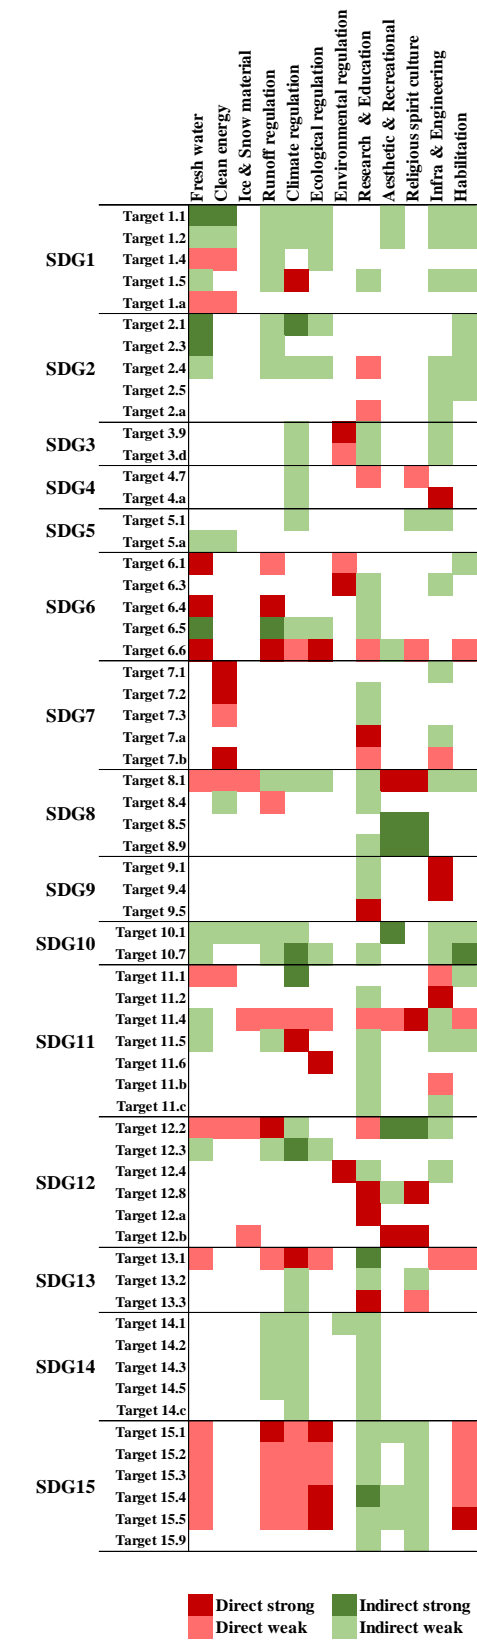

Table S1. The interlinkage of cryosphere services with SDG targets

The interlinkage between 15 SDGs (excluding SDG16 and 17, see explanations in the paper) and 62 targets establish with 12 services is developed, expressed by direct/indirect and strong/weak categories. More specifically , the dark red, light red, dark green and light green correspond to the category of direct-strong, direct-weak, indirect-strong, and indirect-weak interlinkage between CS and SDG targets, respectively.

**Table S2.** The Eigenvector centrality of SDG targets in five communities of the developed network

| SDG targets | Eigenvector centrality | Main cryosphere service    |
|-------------|------------------------|----------------------------|
| 2.4         | <b>0.629</b>           |                            |
| 6.6         | <b>0.695</b>           |                            |
| 10.7        | 0.378                  |                            |
| 12.2        | <b>0.598</b>           | Runoff regulation          |
| 12.3        | 0.216                  | Climate regulation         |
| 14.5        | 0.387                  | Hydrothermal regulation    |
| 15.1        | <b>0.778</b>           | Habitation                 |
| 15.2        | <b>0.611</b>           |                            |
| 15.3        | <b>0.647</b>           |                            |
| 15.4        | <b>0.626</b>           |                            |
| 15.5        | <b>0.557</b>           |                            |
| 1.1         | <b>0.773</b>           |                            |
| 1.2         | <b>0.781</b>           |                            |
| 1.5         | <b>0.740</b>           |                            |
| 2.1         | 0.480                  |                            |
| 2.3         | <b>0.510</b>           | Freshwater                 |
| 3.9         | 0.348                  | Clean energy               |
| 6.1         | <b>0.573</b>           | Infrastructure/engineering |
| 6.5         | 0.282                  |                            |
| 7.1         | <b>0.533</b>           |                            |
| 8.5         | 0.287                  |                            |
| 11.1        | <b>0.673</b>           |                            |
| 11.2        | 0.442                  |                            |
| 11.5        | <b>0.726</b>           |                            |
| 13.1        | <b>0.855</b>           |                            |
| 2.a         | 0.205                  |                            |
| 3.d         | 0.196                  |                            |
| 7.3         | 0.384                  |                            |
| 8.4         | <b>0.703</b>           | Research/education         |
| 9.4         | 0.284                  |                            |
| 9.5         | 0.177                  |                            |
| 12.a        | 0.168                  |                            |
| 8.1         | <b>0.524</b>           | Religious/spirit/culture   |
| 10.1        | 0.337                  | Aesthetic/recreation       |
| 11.4        | 0.445                  | Snow/ice material          |
| 6.3         | 0.201                  |                            |
| 6.4         | 0.208                  | Environment regulation     |
| 14.1        | 0.196                  |                            |

**Table S3.** The classification of the targets related to CS with the six entry points

| Entry points                                | Main aspects in GSDR 2019                                                                                                                           | Targets (keywords)                                    |
|---------------------------------------------|-----------------------------------------------------------------------------------------------------------------------------------------------------|-------------------------------------------------------|
| Human well-being and capabilities           | Life expectancy, material wellbeing and health, education and quality of life, equality opportunities, eliminate deprivations and build resilience, | 1.1 (eradicate extreme poverty)                       |
|                                             |                                                                                                                                                     | 1.2 (reduce poverty)                                  |
|                                             |                                                                                                                                                     | 1.5 (build the resilience of the poor)                |
|                                             |                                                                                                                                                     | 11.5 (reduce the number of deaths)                    |
|                                             |                                                                                                                                                     | 10.1 (income growth of the bottom)                    |
|                                             |                                                                                                                                                     | 6.1 (access to drinking water)                        |
|                                             |                                                                                                                                                     | 8.5 (employment and decent work)                      |
|                                             |                                                                                                                                                     | 1.4 (resources distribution)                          |
|                                             |                                                                                                                                                     | 3.d (the capacity for the health risks)               |
|                                             |                                                                                                                                                     | 13.3 (education and capacity)                         |
|                                             |                                                                                                                                                     | 5.1 (end all forms of discrimination)                 |
|                                             |                                                                                                                                                     | 4.7 (acquire the knowledge and skills)                |
|                                             |                                                                                                                                                     | 12.8 (sustainable development information, awareness) |
|                                             |                                                                                                                                                     | 5.a (equal rights to resources)                       |
|                                             |                                                                                                                                                     | 8.1 (per capita economic growth)                      |
| Sustainable and just economies              | Gross domestic product, environmental externality costs, net output, equality of production and consumption                                         | 12.2 (efficient use of natural resources)             |
|                                             |                                                                                                                                                     | 11.5 (decrease the direct economic losses)            |
|                                             |                                                                                                                                                     | 8.4 (economic growth from environmental degradation)  |
|                                             |                                                                                                                                                     | 9.4 (resource-use efficiency)                         |
|                                             |                                                                                                                                                     | 6.4 (increase water-use efficiency)                   |
|                                             |                                                                                                                                                     | 12.a (scientific and technological capacity)          |
|                                             |                                                                                                                                                     | 8.9 (promote sustainable tourism that creates jobs)   |
|                                             |                                                                                                                                                     | 12.4 (management of chemicals and all wastes)         |
|                                             |                                                                                                                                                     | 14.c (sustainable use of oceans and their resources)  |
|                                             |                                                                                                                                                     | 12.b (sustainable tourism that creates jobs)          |
| Food systems and nutrition patterns         | Sustainable agricultural production, soil health, greenhouse gas emissions from agriculture, safe nutrition for all                                 | 8.5 (full and productive employment)                  |
|                                             |                                                                                                                                                     | 2.1 (end hunger)                                      |
|                                             |                                                                                                                                                     | 2.4 (sustainable food production systems)             |
|                                             |                                                                                                                                                     | 2.3 (the agricultural productivity and incomes)       |
|                                             |                                                                                                                                                     | 12.3 (reduce food waste and losses)                   |
|                                             |                                                                                                                                                     | 6.4 (increase water-use efficiency)                   |
|                                             |                                                                                                                                                     | 2.a (agricultural productive capacity)                |
|                                             |                                                                                                                                                     | 2.5 (genetic diversity of seeds)                      |
| Energy decarbonization and universal access | Effective supply of energy, decarbonization of energy, reduction of greenhouse gas emission                                                         | 7.1 (affordable, reliable and modern energy services) |
|                                             |                                                                                                                                                     | 7.3 (increase the energy efficiency)                  |
|                                             |                                                                                                                                                     | 7.b (sustainable energy services for all)             |
|                                             |                                                                                                                                                     | 7.2 (increase the share of renewable energy)          |
|                                             |                                                                                                                                                     | 7.a (clean energy research and technology)            |

|                                  |                                                                                                                                                        |                                                            |
|----------------------------------|--------------------------------------------------------------------------------------------------------------------------------------------------------|------------------------------------------------------------|
| Urban and peri-urban development | Social management and protection, Equality, Decent work, enhance research and technology, policy, infrastructure of transport systems, buildings, etc. | 1.5 (build the resilience of the poor)                     |
|                                  |                                                                                                                                                        | 13.1 (resilience and adaptive capacity in all countries)   |
|                                  |                                                                                                                                                        | 11.5 (protecting the poor in vulnerable situations)        |
|                                  |                                                                                                                                                        | 11.1 (housing and basic services and upgrade slums)        |
|                                  |                                                                                                                                                        | 10.7 (planned and well-managed migration policies)         |
|                                  |                                                                                                                                                        | 11.2 (improving road safety, expanding public transport)   |
|                                  |                                                                                                                                                        | 6.5 (integrated water resources management)                |
|                                  |                                                                                                                                                        | 6.4 (increase water-use efficiency across all sectors)     |
|                                  |                                                                                                                                                        | 9.1 (regional and transborder infrastructure)              |
|                                  |                                                                                                                                                        | 1.4 (resources distribution)                               |
|                                  |                                                                                                                                                        | 7.b (expand infrastructure and upgrade technology)         |
|                                  |                                                                                                                                                        | 9.4 (upgrade infrastructure for and retrofit industries)   |
|                                  |                                                                                                                                                        | 11.4 (protect the cultural and natural heritage)           |
|                                  |                                                                                                                                                        | 11.b (integrated policies and plans)                       |
|                                  |                                                                                                                                                        | 11.c (building sustainable and resilient buildings)        |
|                                  |                                                                                                                                                        | 9.5 (the technological capabilities of industrial sectors) |
|                                  |                                                                                                                                                        | 1.a (implement programmes and policies to end poverty)     |
|                                  |                                                                                                                                                        |                                                            |
|                                  |                                                                                                                                                        | 15.1 (terrestrial and inland freshwater ecosystems)        |
|                                  |                                                                                                                                                        | 15.3 (desertification and land degradation)                |
| Global environmental commons     | Biodiversity conservation, Nature resources, Environment friendly and treatment (air, land, and ocean), Climate change                                 | 6.6 (water-related ecosystems)                             |
|                                  |                                                                                                                                                        | 15.4 (mountain ecosystems)                                 |
|                                  |                                                                                                                                                        | 15.2 (sustainable management of forests)                   |
|                                  |                                                                                                                                                        | 15.5 (natural habitats and threatened species)             |
|                                  |                                                                                                                                                        | 11.5 (protect people in vulnerable situations)             |
|                                  |                                                                                                                                                        | 14.5 (coastal and marine areas)                            |
|                                  |                                                                                                                                                        | 14.1 (reduce marine pollution of all kinds)                |
|                                  |                                                                                                                                                        | 14.2 (marine and coastal ecosystems)                       |
|                                  |                                                                                                                                                        | 14.3 (ocean acidification)                                 |
|                                  |                                                                                                                                                        | 13.2 (Integrate climate change measures)                   |
|                                  |                                                                                                                                                        | 3.9 (pollution and contamination)                          |
|                                  |                                                                                                                                                        | 6.3 (reducing pollution, eliminating dumping)              |
|                                  |                                                                                                                                                        | 9.4 (clean and environmentally sound technologies)         |
|                                  |                                                                                                                                                        | 14.c (Convention on the Law of the Sea)                    |
|                                  |                                                                                                                                                        | 11.6 (environmental impact, air quality, etc)              |
|                                  |                                                                                                                                                        | 15.9 (integrate ecosystem and biodiversity values)         |

Note: The six entry points are not a single pathway but contain multiple dimensions to the implements of SDGs and targets. The pathways in association with basic human needs, economy, agriculture, energy, society and environment to achieve transformational change towards sustainable development through the six entry points.

The 2019 Global Sustainability Report (GSDR 2019) provides a detailed overview of the dimensions of the six entry points and the main aspects involved as shown in the supplement of Table S3. The 17 Sustainable Development Goals (SDGs) are comprehensive goals, and 169 targets correspond to all aspects of the SDGs. 62 targets related to cryosphere services divide into six categories: human needs, economy, agriculture, energy, society and ecology dimensions corresponding to the SEPs in the supplementary table S3.

**Table S4.** The eigenvector centralities of targets in six entry point networks

[illegible]

**Table S5.** Direct and indirect casual effects of the cryosphere service on SDG targets, developed on the basis of references

| SDG Targets                                                                                                                                   | Cryosphere Services      | Causal Effects                                                                                                                                      | References                                             |
|-----------------------------------------------------------------------------------------------------------------------------------------------|--------------------------|-----------------------------------------------------------------------------------------------------------------------------------------------------|--------------------------------------------------------|
| <b>Goal 1. End poverty in all its forms everywhere</b>                                                                                        |                          |                                                                                                                                                     |                                                        |
| <b>Target 1.1</b> By 2030, eradicate extreme poverty for all people everywhere, currently measured as people living on less than \$1.25 a day | Fresh water              | Meltwater→economic system (agriculture, husbandry and other industries)→increase income to eradicate extreme poverty                                | (Sherpa et al., 2014; Viviroli et al., 2020)           |
|                                                                                                                                               | Clean energy             | Electric energy→economic(social) system→promote economic growth and eradicate multidimensional poverty                                              | (Gaudard et al., 2016; Vergara et al., 2007)           |
|                                                                                                                                               | Runoff regulation        | Runoff regulation→seasonal water allocation (agricultural irrigation)→ensure sustainable food production to eradicate extreme poverty               | (Nüsser and Baghel, 2016)                              |
|                                                                                                                                               | Climate regulation       | Climate regulation→reduce the frequency of climate change hazards→eradicate extreme poverty caused by the climate change                            | (Hallegatte et al., 2015; Reyer et al., 2017)          |
|                                                                                                                                               | Hydrothermal regulation  | Ecological regulation (hydrothermal)→maintain the stability of ecosystem services→eradicate extreme poverty caused by natural disaster (i.e. frost) | (Smadja et al., 2015)                                  |
|                                                                                                                                               | Aesthetic & Recreational | Aesthetic & Recreational→the development of cryosphere tourism→increase income to eradicate extreme poverty                                         | (Blair, 2015; Wang et al., 2010)                       |
|                                                                                                                                               | Habitation               | Habitation→provide a stable environment for agricultural and livelihood→reduce losses and eradicate extreme poverty                                 | (Prasain, 2018; Yang et al., 2018; Young et al., 2018) |
|                                                                                                                                               | Infra & Engineering      | Permafrost engineering supporting→infrastructure construction (transportation, pipeline, etc)→promote economic development and eradicate poverty    | (Johnston, 1982; Yershov, 1998)                        |
| <b>Target 1.2</b> By 2030, reduce at least by half the proportion of men, women and children of all ages living in poverty in all             | Fresh water              | Meltwater→sustainable food production systems (agricultural, husbandry, etc)→eradicate multidimensional poverty                                     | (Sherpa et al., 2014; Viviroli et al., 2020)           |
|                                                                                                                                               | Clean energy             | Electric energy→economic(social) system→promote economic growth and eradicate multidimensional poverty                                              | (Gaudard et al., 2016; Vergara et al., 2007)           |

|                                                                                                                                                                                                                                                                                                                                                           |                          |                                                                                                                                                      |                                                |
|-----------------------------------------------------------------------------------------------------------------------------------------------------------------------------------------------------------------------------------------------------------------------------------------------------------------------------------------------------------|--------------------------|------------------------------------------------------------------------------------------------------------------------------------------------------|------------------------------------------------|
| its dimensions according to national definitions                                                                                                                                                                                                                                                                                                          | Runoff regulation        | Runoff regulation→seasonal water allocation (agricultural irrigation)→ensure sustainable food production to eradicate extreme poverty                | (Nüsser and Baghel, 2016)                      |
|                                                                                                                                                                                                                                                                                                                                                           | Climate regulation       | Climate regulation→reduce the frequency of climate change hazards→eradicate dimension poverty caused by the climate change                           | (Hallegate et al., 2015)                       |
|                                                                                                                                                                                                                                                                                                                                                           | Hydrothermal regulation  | Ecological regulation (hydrothermal)→maintain the stability of ecosystem services→eradicate extreme poverty caused by ecological environment changes | (Smadja et al., 2015)                          |
|                                                                                                                                                                                                                                                                                                                                                           | Aesthetic & Recreational | Aesthetic & Recreational→the development of cryosphere tourism→increase income to eradicate extreme poverty                                          | (Blair, 2015; Wang et al., 2010)               |
|                                                                                                                                                                                                                                                                                                                                                           | Habitation               | Habitation→provide a stable environment for livelihood and reduce the impacts of cryosphere changes→reduce losses and multidimensional poverty       | (Bury et al., 2013)                            |
|                                                                                                                                                                                                                                                                                                                                                           | Infra & Engineering      | Permafrost engineering supporting→infrastructure construction (road, railway, etc)→promote economic development and eradicate extreme poverty        | (Johnston, 1982; Yershov, 1998)                |
| <b>Target 1.4</b> By 2030, ensure that all men and women, in particular the poor and the vulnerable, have equal rights to economic resources, as well as access to basic services, ownership and control over land and other forms of property, inheritance, natural resources, appropriate new technology and financial services, including microfinance | Fresh water              | Meltwater→ensure the economic resources and access to basic services                                                                                 | (Sherpa et al., 2014; Viroli et al., 2020)     |
|                                                                                                                                                                                                                                                                                                                                                           | Clean energy             | Electric energy→ensure the economic resources and access to basic services                                                                           | (Gaudard et al., 2016; Vergara et al., 2007)   |
|                                                                                                                                                                                                                                                                                                                                                           | Hydrothermal regulation  | Ecological regulation (hydrothermal)→maintain the stability of ecosystem services→provide economic resources to access to basic services             | (Qin et al., 2020; Smadja et al., 2015)        |
|                                                                                                                                                                                                                                                                                                                                                           | Runoff regulation        | Runoff regulation→spatial and temporal scale allocation of water resources→have equal rights to basic services and equitable distribution            | (Nüsser and Baghel, 2016; Vuille et al., 2018) |
| <b>Target 1.5</b> By 2030, build the resilience of the poor and those in vulnerable situations and reduce their exposure and                                                                                                                                                                                                                              | Fresh water              | Meltwater→access to safe and affordable water for agriculture→reduce the exposure to climate change hazards (drought, etc.)                          | (Dangi et al., 2018; Huss et al., 2017)        |
|                                                                                                                                                                                                                                                                                                                                                           | Climate regulation       | Climate regulation→reduce the frequency to exposure to climate change hazards                                                                        | (Rasmussen, 2016)                              |

|                                                                                                                                                                    |                      |                                                                                                                                                           |                                              |
|--------------------------------------------------------------------------------------------------------------------------------------------------------------------|----------------------|-----------------------------------------------------------------------------------------------------------------------------------------------------------|----------------------------------------------|
| vulnerability to climate change hazards and other economic, social and environmental shocks and disasters                                                          | Runoff regulation    | Runoff regulation→seasonal water allocation (agricultural irrigation)→build the resilience to reduce the exposure to climate change hazards               | (Vuille et al., 2018)                        |
|                                                                                                                                                                    | Research & Education | Research & Education (environment awareness and measurement)→build the resilience to reduce the exposure to climate change hazards                        | (Nüsser et al., 2018)                        |
|                                                                                                                                                                    | Habitation           | Habitation→provide a stable environment for livelihood→build the resilience to reduce the exposure to climate change hazards                              | (Parveen et al., 2015)                       |
|                                                                                                                                                                    | Infra & Engineering  | Permafrost engineering supporting→infrastructure construction (building, transports, etc)→build the resilience and reduce the exposure to climate hazards | (Johnston, 1982; Yershov, 1998)              |
| <b>Target 1.a</b> Ensure significant mobilization of resources from a variety of sources to implement programmes and policies to end poverty in all its dimensions | Fresh water          | Meltwater→ensure mobilization of resources from a variety of sources                                                                                      | (Sherpa et al., 2014)                        |
|                                                                                                                                                                    | Clean energy         | Electric energy→ensure mobilization of resources from a variety of sources                                                                                | (Gaudard et al., 2016; Vergara et al., 2007) |

## Goal 2. End hunger, achieve food security and improved nutrition and promote sustainable agriculture

|                                                                                                                                                                                                              |                         |                                                                                                                                             |                                                                    |
|--------------------------------------------------------------------------------------------------------------------------------------------------------------------------------------------------------------|-------------------------|---------------------------------------------------------------------------------------------------------------------------------------------|--------------------------------------------------------------------|
| <b>Target 2.1</b> By 2030, end hunger and ensure access by all people, in particular the poor and people in vulnerable situations, including infants, to safe, nutritious and sufficient food all year round | Fresh water             | Meltwater→agricultural irrigation→protect agricultural output and sufficient food to end hunger                                             | (Biemans et al., 2019; Nüsser and Schmidt, 2017; Qin et al., 2020) |
|                                                                                                                                                                                                              | Climate regulation      | Climate regulation→reduce the frequency of climate change hazards (pests, hazards, diseases, etc)→protect agricultural output to end hunger | (FAO, 2018; Najafi et al., 2019; Myers et al., 2017)               |
|                                                                                                                                                                                                              | Hydrothermal regulation | Ecological regulation (hydrothermal)→maintain the stability of agro-ecosystem→protect agricultural output and sufficient food to end hunger | (Mukherji et al., 2019)                                            |
|                                                                                                                                                                                                              | Runoff regulation       | Runoff regulation→seasonal water resource for agricultural irrigation→ensure sustainable food production to end hunger                      | (Nüsser and Baghel 2016; Qin et al., 2020)                         |
| <b>Target 2.3</b> By 2030, double the agricultural productivity and incomes of small-scale                                                                                                                   | Habitation              | Habitation→provide a stable environment for agricultural system→protect agricultural output and sufficient food to end hunger               | (Gentle and Maraseni, 2012; Ingti, 2017; Qin et al., 2020)         |
|                                                                                                                                                                                                              | Fresh water             | Meltwater→agricultural irrigation→increase agricultural productivity and output                                                             | (Biemans et al., 2019; Nüsser and Schmidt, 2017)                   |



|                                                                                                                                                                                                                                                                                                                                                                       |                         |                                                                                                                                                          |                                                                   |
|-----------------------------------------------------------------------------------------------------------------------------------------------------------------------------------------------------------------------------------------------------------------------------------------------------------------------------------------------------------------------|-------------------------|----------------------------------------------------------------------------------------------------------------------------------------------------------|-------------------------------------------------------------------|
| food producers, in particular women, indigenous peoples, family farmers, pastoralists and fishers, including through secure and equal access to land, other productive resources and inputs, knowledge, financial services, markets and opportunities for value addition and non-farm employment                                                                      | Climate regulation      | Climate regulation→reduce the frequency of climate change hazards (pests, hazards, diseases, etc) →protect agricultural output, productivity and incomes | (FAO, 2018; Viviroli et al., 2020)                                |
|                                                                                                                                                                                                                                                                                                                                                                       | Runoff regulation       | Runoff regulation→seasonal water resource for agricultural irrigation→ensure sustainable food production systems                                         | (Barnett et al., 2005; Nüsser and Baghel, 2016; Qin et al., 2020) |
|                                                                                                                                                                                                                                                                                                                                                                       | Habitation              | Habitation→provide a stable environment for agricultural system→protect agricultural output and increasing agricultural productivity                     | (Gentle and Maraseni, 2012; Ingty, 2017; Qin et al., 2020)        |
| <b>Target 2.4</b> By 2030, ensure sustainable food production systems and implement resilient agricultural practices that increase productivity and production, that help maintain ecosystems, that strengthen capacity for adaptation to climate change, extreme weather, drought, flooding and other disasters and that progressively improve land and soil quality | Fresh water             | Meltwater→protect the agricultural output→ensure sustainable food production systems                                                                     | (Biemans et al., 2019; Nüsser and Schmidt, 2017; Pritchard, 2019) |
|                                                                                                                                                                                                                                                                                                                                                                       | Climate regulation      | Climate regulation→reduce the frequency of climate change hazards (pests, hazards, diseases, etc) →ensure sustainable food production systems            | (FAO, 2018; Myers et al., 2017)                                   |
|                                                                                                                                                                                                                                                                                                                                                                       | Runoff regulation       | Runoff regulation→seasonal distribution of water resources for agricultural irrigation→ensure sustainable food production systems                        | (Nüsser et al., 2018; Nüsser and Baghel 2016)                     |
|                                                                                                                                                                                                                                                                                                                                                                       | Hydrothermal regulation | Ecological regulation (hydrothermal)→maintain the stability of agro-ecosystem→ensure sustainable food production systems                                 | (Mukherji et al., 2019)                                           |
|                                                                                                                                                                                                                                                                                                                                                                       | Research & Education    | Research & Education (cryosphere serves agriculture practices)→establish a stable agricultural system                                                    | (Fuhrer et al, 2014; Hussain et al., 2018)                        |
|                                                                                                                                                                                                                                                                                                                                                                       | Infra & Engineering     | Permafrost engineering supporting→rural infrastructure construction (building, irrigation, etc)→ensure sustainable food production and to end hunger     | (Johnstone, 1981; Yershov, 1998)                                  |
| <b>Target 2.5</b> By 2020, maintain the genetic diversity of seeds through diversified seed and plant banks at the national, regional and international levels                                                                                                                                                                                                        | Habitation              | Habitation→provide a stable environment for agricultural system→ensure sustainable food production systems                                               | (Bury et al., 2011; Gentle and Maraseni, 2012; Ingty, 2017)       |
|                                                                                                                                                                                                                                                                                                                                                                       | Habitation              | Habitation→provide a stable environment for ecosystem→maintain the genetic diversity of seeds                                                            | (SROCC, 2019)                                                     |
|                                                                                                                                                                                                                                                                                                                                                                       | Infra & Engineering     | Permafrost engineering supporting→infrastructure construction (seed banks)→maintain the genetic diversity                                                | (Chin, 1994)                                                      |

|                                                                                                                                                                                                                                                                                              |                      |                                                                                                                                               |                                                |
|----------------------------------------------------------------------------------------------------------------------------------------------------------------------------------------------------------------------------------------------------------------------------------------------|----------------------|-----------------------------------------------------------------------------------------------------------------------------------------------|------------------------------------------------|
| <b>Target 2.a</b> Increase investment in rural infrastructure, agricultural research and extension services, technology development and plant and livestock gene banks in order to enhance agricultural productive capacity in developing countries, in particular least developed countries | Research & Education | Research & Education (cryosphere serves agriculture practices)→strengthen agricultural research and establish a stainable agricultural system | (Nusser et al., 2019; Nüsser and Baghel, 2016) |
|                                                                                                                                                                                                                                                                                              | Infra & Engineering  | Permafrost engineering supporting→rural infrastructure construction (building, irrigation, etc)→enhance agricultural productive capacity      | (Johnstone, 1981; Yershov, 1998)               |

### Goal 3. Ensure healthy lives and promote well-being for all at all ages

|                                                                                                                                                                                      |                          |                                                                                                                                                         |                                                                                     |
|--------------------------------------------------------------------------------------------------------------------------------------------------------------------------------------|--------------------------|---------------------------------------------------------------------------------------------------------------------------------------------------------|-------------------------------------------------------------------------------------|
| <b>Target 3.9</b> By 2030, substantially reduce the number of deaths and illnesses from hazardous chemicals and air, water and soil pollution and contamination                      | Environmental regulation | Environmental regulation (contaminents storage)→reduce the number of deaths and illnesses from pollution and contamination                              | (Colombo et al., 2018; Hodson, 2014; Milner et al., 2017; Søndergaard et al., 2015) |
|                                                                                                                                                                                      | Climate regulation       | Climate regulation→reduce the frequency of climate-related disasters and the number of deaths and illnesses from hazardous                              | (Estallo et al., 2015; Li and Yap, 2011; Sherpa, 2014)                              |
|                                                                                                                                                                                      | Infra & Engineering      | Permafrost engineering supporting→infrastructure construction (waste storage)→reduce the number of deaths and illnesses from hazardous chemicals        | (Glotov et al., 2018; Govaerts et al., 2016)                                        |
|                                                                                                                                                                                      | Research & Education     | Research & Education→improve awareness and measures to the cryosphere-derived contaminants→reduce the number of deaths and illnesses from contamination | (Colombo et al., 2018)                                                              |
| <b>Target 3.d</b> Strengthen the capacity of all countries, in particular developing countries, for early warning, risk reduction and management of national and global health risks | Environmental regulation | Environmental regulation (contaminents storage)→reduce the number of deaths and illnesses from pollution and contamination                              | (Colombo et al., 2018; Milner et al., 2017)                                         |
|                                                                                                                                                                                      | Research & Education     | Research & Education (cryosphere changes and impact)→improve risk awareness and emergency measures→strengthen capacity for adaptation to climate change | (Fuhrer et al., 2014; Hussain et al., 2018; Rasul et al., 2019)                     |
|                                                                                                                                                                                      | Climate regulation       | Climate regulation→reduce the frequency of climate-related disasters→strengthen capacity for adaptation and risk reduction to climate change            | (Rasmussen, 2016; Sherpa, 2014)                                                     |

|  |                     |                                                                                                                        |                                                |
|--|---------------------|------------------------------------------------------------------------------------------------------------------------|------------------------------------------------|
|  | Infra & Engineering | Permafrost engineering supporting → infrastructure construction → strengthen the capacity to cope with disasters risks | (Duvillard, 2019; Phillips and Margreth, 2008) |
|--|---------------------|------------------------------------------------------------------------------------------------------------------------|------------------------------------------------|

#### Goal 4. Ensure inclusive and equitable quality education and promote lifelong learning opportunities for all

|                                                                                                                                                                                                                                                 |                               |                                                                                                                                                    |                                             |
|-------------------------------------------------------------------------------------------------------------------------------------------------------------------------------------------------------------------------------------------------|-------------------------------|----------------------------------------------------------------------------------------------------------------------------------------------------|---------------------------------------------|
| <b>Target 4.7</b> By 2030, ensure that all learners acquire the knowledge and skills needed to promote sustainable development, including, among others, through education, lifestyles and of culture's contribution to sustainable development | Climate regulation            | Climate regulation → reduce the frequency of climate-related disasters → reduce the influence of climate change to the education of the population | (Kara and Yucel, 2015)                      |
|                                                                                                                                                                                                                                                 | Research & Education          | Research & Education → acquire the knowledge and skills needed to promote cryosphere sustainable development                                       | (IPCC, 2018; SROCC, 2019)                   |
|                                                                                                                                                                                                                                                 | Religious & Spirit & Cultural | Religious & Spirit & Cultural → lifestyles and of culture's (knowledge and skills) contribution to sustainable development                         | (Brugger et al., 2013; Gagne et al., 2014)  |
| <b>Target 4.a</b> Build and upgrade education facilities that are child, disability and gender sensitive and provide safe, non-violent, inclusive and effective learning environments for all                                                   | Climate regulation            | Climate regulation → reduce the frequency of climate-related disasters → provide safe learning environments for all                                | (Kara and Yucel, 2015; Sherpa et al., 2014) |
|                                                                                                                                                                                                                                                 | Infra & Engineering           | Permafrost engineering supporting → infrastructure construction (build and upgrade school and related education facilities)                        | (Vincent et al., 2013)                      |

#### Goal 5. Achieve gender equality and empower all women and girls

|                                                                                          |                               |                                                                                                                                         |                                         |
|------------------------------------------------------------------------------------------|-------------------------------|-----------------------------------------------------------------------------------------------------------------------------------------|-----------------------------------------|
| <b>Target 5.1</b> End all forms of discrimination against all women and girls everywhere | Climate regulation            | Climate regulation → reduce the frequency of climate-related disasters to the poverty → end all forms of discrimination against for all | (Verma and Khadka, 2011)                |
|                                                                                          | Religious & Spirit & Cultural | Religious spirit and cultural services → universal spiritual value for all → end all forms of discrimination                            | (UNESCO, 2012)                          |
|                                                                                          | Infra & Engineering           | Permafrost engineering supporting → infrastructure construction → providing economic development and disaster-resistant for all         | (Vincent et al., 2013)                  |
| <b>Target 5.a</b> Undertake reforms to give women equal rights to economic resources,    | Fresh water                   | Meltwater → access to water resources for all → ensure equal rights to economic water resources                                         | (Dangi et al., 2018; Huss et al., 2017) |

|                                                                                                                                                                           |              |                                                                                                                                                                       |                                          |
|---------------------------------------------------------------------------------------------------------------------------------------------------------------------------|--------------|-----------------------------------------------------------------------------------------------------------------------------------------------------------------------|------------------------------------------|
| as well as access to ownership and control over land and other forms of property, financial services, inheritance and natural resources, in accordance with national laws | Clean energy | Electric energy→access to affordable, reliable and modern energy for all→ensure equal rights to hydropower resources<br>Realize the popularization of electric energy | (IHA, 2018, 2020; McDowell et al., 2013) |
|---------------------------------------------------------------------------------------------------------------------------------------------------------------------------|--------------|-----------------------------------------------------------------------------------------------------------------------------------------------------------------------|------------------------------------------|

## Goal 6. Ensure availability and sustainable management of water and sanitation for all

|                                                                                                                                                                                                                                                                        |                          |                                                                                                                                                   |                                                                     |
|------------------------------------------------------------------------------------------------------------------------------------------------------------------------------------------------------------------------------------------------------------------------|--------------------------|---------------------------------------------------------------------------------------------------------------------------------------------------|---------------------------------------------------------------------|
| <b>Target 6.1</b> By 2030, achieve universal and equitable access to safe and affordable drinking water for all                                                                                                                                                        | Fresh water              | Meltwater→access to safe and affordable drinking water for all                                                                                    | (Beniston and Stoffel, 2014; Dangi et al., 2018; Huss et al., 2017) |
|                                                                                                                                                                                                                                                                        | Runoff regulation        | Runoff regulation→seasonal distribution of water resources to ensure access to affordable water for all                                           | (Buytaert and Bievre, 2012)                                         |
|                                                                                                                                                                                                                                                                        | Environmental regulation | Environmental regulation (contaminants concentration)→reduce contaminants (organic, inorganic, etc) and access to safe water for all              | (Milner et al., 2017; Rui et al., 2014; Zaharescu et al., 2016)     |
|                                                                                                                                                                                                                                                                        | Habitation               | Habitation→provide a stable environment for water-related ecosystem→access to water for all                                                       | (Beniston and Stoffel, 2014; Gentle and Thwaites, 2016)             |
| <b>Target 6.3</b> By 2030, improve water quality by reducing pollution, eliminating dumping and minimizing release of hazardous chemicals and materials, halving the proportion of untreated wastewater and substantially increasing recycling and safe reuse globally | Environmental regulation | Environmental regulation (contaminants storage)→reduce contaminantsin and improve water quality                                                   | (Milner et al., 2017)                                               |
|                                                                                                                                                                                                                                                                        | Research & Education     | Research & Education (cryosphere contaminants concentration)→risk awareness and implementation measures→improve water quality by reduce pollution | (Glotov et al., 2018)                                               |
|                                                                                                                                                                                                                                                                        | Infra & Engineering      | Permafrost engineering supporting→infrastructure construction (waste storage)→improve water quality by reduce pollution                           | (Glotov et al., 2018; Govaerts et al., 2016)                        |
| <b>Target 6.4</b> By 2030, substantially increase water-use efficiency across all sectors and ensure sustainable withdrawals and supply of freshwater to address water                                                                                                 | Freshwater               | Meltwater→ensure sustainable withdrawals and supply of freshwater to address water scarcity                                                       | (Dangi et al., 2018; Huss et al., 2017)                             |
|                                                                                                                                                                                                                                                                        | Runoff regulation        | Runoff regulation→seasonal distribution of the water to increase water-use efficiency                                                             | (Farinotti et al., 2019; Nüsser et al., 2019)                       |

|                                                                                                                                                      |                               |                                                                                                                                               |                                                                       |
|------------------------------------------------------------------------------------------------------------------------------------------------------|-------------------------------|-----------------------------------------------------------------------------------------------------------------------------------------------|-----------------------------------------------------------------------|
| scarcity and substantially reduce the number of people suffering from water scarcity                                                                 | Research & Education          | Research & Education→cryosphere meltwater utilization and distribution→substantially increase water-use efficiency to address water scarcity  | (Orlove et al., 2019; Rasul and Molden, 2019)                         |
| <b>Target 6.5</b> By 2030, implement integrated water resources management at all levels, including through transboundary cooperation as appropriate | Freshwater                    | Meltwater→water resources supply→implement integrated water resources management                                                              | (Jamir, 2016; Yang et al., 2014)                                      |
|                                                                                                                                                      | Runoff regulation             | Runoff regulation→seasonal distribution of the water resources for social-economic system→implement integrated water resources management     | (Xenarios et al., 2019)                                               |
|                                                                                                                                                      | Climate regulation            | Climate regulation→mitigate the impact of climate change on water supply and demand→implement integrated water resources management           | (Gaudard et al., 2014)                                                |
|                                                                                                                                                      | Hydrothermal regulation       | Ecological regulation (hydrothermal)→spatial-temporal distribution of ecology water resources→implement integrated water resources management | (Zhang et al., 2020)                                                  |
|                                                                                                                                                      | Research & Education          | Research & Education (meltwater research)→risk awareness and responses strategies→implement integrated water resources management             | (Archer et al., 2010; Barnett et al., 2005; Giacomelli et al., 2008)  |
| <b>Target 6.6</b> By 2020, protect and restore water-related ecosystems, including mountains, forests, wetlands, rivers, aquifers and lakes          | Fresh water                   | Meltwater (ecology water)→protect and restore water-related ecosystems                                                                        | (Milner et al., 2017; Schoen et al., 2017)                            |
|                                                                                                                                                      | Runoff regulation             | Runoff regulation→seasonal allocation of ecological water and nutrients→protect and restore water-related ecosystems                          | (Fell et al., 2017, 2018; Hawkings et al., 2014; Lawson et al., 2014) |
|                                                                                                                                                      | Hydrothermal regulation       | Ecological regulation (hydrothermal)→protect and restore water-related ecosystems                                                             | (Comola et al., 2015; Matteodo et al., 2016)                          |
|                                                                                                                                                      | Climate regulation            | Climate regulation→mitigate the impact of climate change and protect water-related ecosystems                                                 | (Hoegh-Guldberg et al., 2018; Milner et al., 2017)                    |
|                                                                                                                                                      | Research & Education          | Research & Education→environment awareness to protect the water-related ecosystems                                                            | (Rosvold, 2016)                                                       |
|                                                                                                                                                      | Aesthetic & Recreational      | Aesthetic & Recreational→environment awareness and sustainable development→protect and restore water-related ecosystems                       | (Garavaglia et al., 2012; Garavaglia and Pelfini, 2011)               |
|                                                                                                                                                      | Religious & Spirit & Cultural | Cryosphere religious and cultural→environment awareness and protect cryosphere meltwater-related ecosystems                                   | (Allison, 2015; Hussain et al., 2018)                                 |

|                                                                                                                                                                                                                                                     |                      |                                                                                                                                              |                                                                                     |
|-----------------------------------------------------------------------------------------------------------------------------------------------------------------------------------------------------------------------------------------------------|----------------------|----------------------------------------------------------------------------------------------------------------------------------------------|-------------------------------------------------------------------------------------|
|                                                                                                                                                                                                                                                     | Habitation           | Habitation→provide a stable environment to protect and restore water-related ecosystems                                                      | (Eby et al., 2014; Fell et al., 2017, 2018; Vuille et al., 2018)                    |
| <b>Goal 7. Ensure access to affordable, reliable, sustainable and modern energy for all</b>                                                                                                                                                         |                      |                                                                                                                                              |                                                                                     |
| <b>Target 7.1</b> By 2030, ensure universal access to affordable, reliable and modern energy services                                                                                                                                               | Clean energy         | Electric energy→access to affordable, reliable and modern energy                                                                             | (Chen et al., 2005; Farinotti et al., 2019; IHA, 2018, 2020; McDowell et al., 2013) |
|                                                                                                                                                                                                                                                     | Infra & Engineering  | Permafrost engineering supporting→infrastructure construction (dam. etc)→the foundation of hydropower to access to clean energy              | (Schwanghart et al., 2016)                                                          |
| <b>Target 7.2</b> By 2030, increase substantially the share of renewable energy in the global energy mix                                                                                                                                            | Clean energy         | Electric energy→increase renewable energy and substantially the share of renewable energy                                                    | (Farinotti et al., 2019; IHA, 2018, 2020; IRENA, 2018; McDowell et al., 2013)       |
|                                                                                                                                                                                                                                                     | Research & Education | Research & Education (hydropower related cryosphere)→environmental awareness and technology to increase the renewable energy                 | (Farinotti et al., 2019; Hamudududu and Killingveit, 2012)                          |
| <b>Target 7.3</b> By 2030, double the global rate of improvement in energy efficiency                                                                                                                                                               | Clean energy         | Electric energy→double the rate of improvement in efficiency of clean energy production                                                      | (Farinotti et al., 2019; IHA, 2018, 2020)                                           |
|                                                                                                                                                                                                                                                     | Research & Education | Research & Education (hydropower related cryosphere)→incorporate strategies into management →increase renewable energy production efficiency | (Braun and Fournier, 2016; Farinotti et al., 2019)                                  |
| <b>Target 7.a</b> By 2030, enhance international cooperation to facilitate access to clean energy research and technology, including renewable energy, energy efficiency and advanced and cleaner fossil-fuel technology, and promote investment in | Research & Education | Research & Education (hydropower related cryosphere)→environmental awareness and actions→increase substantially of the renewable energy      | (Braun and Fournier, 2016; Farinotti et al., 2019)                                  |
|                                                                                                                                                                                                                                                     | Infra & Engineering  | Permafrost engineering supporting→infrastructure construction (dam. etc)→the foundation of hydropower to access to clean energy              | (Schwanghart et al., 2016)                                                          |

|                                                                                                                                                                                                                                                                                                  |                      |                                                                                                                                      |                                                                                     |
|--------------------------------------------------------------------------------------------------------------------------------------------------------------------------------------------------------------------------------------------------------------------------------------------------|----------------------|--------------------------------------------------------------------------------------------------------------------------------------|-------------------------------------------------------------------------------------|
| energy infrastructure and clean energy technology                                                                                                                                                                                                                                                |                      |                                                                                                                                      |                                                                                     |
| <b>Target 7.b</b> By 2030, expand infrastructure and upgrade technology for supplying modern and sustainable energy services for all in developing countries, in particular least developed countries, small island developing States, in accordance with their respective programmes of support | Clean energy         | Electric energy→supply modern and sustainable energy services                                                                        | (Chen et al., 2005; Farinotti et al., 2019; IHA, 2018, 2020; McDowell et al., 2013) |
|                                                                                                                                                                                                                                                                                                  | Infra & Engineering  | Permafrost engineering supporting→expand infrastructure construction (dam, etc) for supplying modern and sustainable energy services | (Schwanghart et al., 2016)                                                          |
|                                                                                                                                                                                                                                                                                                  | Research & Education | Research & Education (hydropower related cryosphere)→hydropower engineering technology for supplying energy services                 | (Karki et al, 2015; Terrier et al., 2015)                                           |

## Goal 8. Promote sustained, inclusive and sustainable economic growth, full and productive employment and decent work for all

|                                                                                                                                                                                                                |                      |                                                                                                                                    |                                                                                     |
|----------------------------------------------------------------------------------------------------------------------------------------------------------------------------------------------------------------|----------------------|------------------------------------------------------------------------------------------------------------------------------------|-------------------------------------------------------------------------------------|
| <b>Target 8.1</b> Sustain per capita economic growth in accordance with national circumstances and, in particular, at least 7 percent gross domestic product growth per annum in the least developed countries | Fresh water          | Meltwater→economic system (agriculture, husbandry and other industries)→economic growth in accordance with national circumstances  | (Milner et al., 2017; Schoen et al., 2017; Sherpa et al., 2014; Sturm et al., 2017) |
|                                                                                                                                                                                                                | Clean energy         | Electric energy→economic benefits of electricity energy→economic growth in accordance with national circumstances                  | (Gaudard et al., 2016; Vergara et al., 2007)                                        |
|                                                                                                                                                                                                                | Ice & Snow materials | Cryosphere resources (Ice & Snow conditions)→basis of cryosphere tourism→economic growth in accordance with national circumstances | (Grünwald et al, 2015; Paden et al., 2013; Steiger et al., 2019; Vanat, 2018, 2020) |
|                                                                                                                                                                                                                | Climate regulation   | Climate regulation→reduce the frequency of climate change hazards→ensure the economic stability and growth                         | (Beaudin and Huang, 2014; Prowse, 2009; Scott, 2019; Spandre et al., 2019a, 2019b)  |
|                                                                                                                                                                                                                | Runoff regulation    | Runoff regulation→seasonal distribution of the water resources for agriculture→economic growth                                     | (Bokhorst et al., 2016; Nüsser et al., 2018)                                        |

|                                                                                                                                                                                                                                                                                                                                      |                               |                                                                                                                                               |                                                              |
|--------------------------------------------------------------------------------------------------------------------------------------------------------------------------------------------------------------------------------------------------------------------------------------------------------------------------------------|-------------------------------|-----------------------------------------------------------------------------------------------------------------------------------------------|--------------------------------------------------------------|
|                                                                                                                                                                                                                                                                                                                                      | Hydrothermal regulation       | Ecological regulation (hydrothermal)→protect and restore eco-tourism→sustain economic growth                                                  | (Council, Arctic, 2013)                                      |
|                                                                                                                                                                                                                                                                                                                                      | Aesthetic & Recreational      | Aesthetic & Recreational→cryosphere tourism development to improve the economic growth in accordance with national circumstances              | (Konchar et al., 2015; Vanat, 2018, 2020; Wang et al., 2010) |
|                                                                                                                                                                                                                                                                                                                                      | Religious & Spirit & Cultural | Religious & Spirit & Cultural→cryosphere tourism development to improve the economic growth in accordance with national circumstances         | (Becken et al., 2013)                                        |
|                                                                                                                                                                                                                                                                                                                                      | Research & Education          | Research & Education (cryosphere serves economic research)→utilization and distribution of cryosphere resources→sustainable economic research | (Spandre et al., 2019a, 2019b; Steiger et al., 2017)         |
|                                                                                                                                                                                                                                                                                                                                      | Infra & Engineering           | Permafrost engineering supporting→infrastructure construction→increasing the economic development                                             | (Johnstone, 1983; Yershov, 1998)                             |
| <b>Target 8.4</b> Improve progressively, through 2030, global resource efficiency in consumption and production and endeavour to decouple economic growth from environmental degradation, in accordance with the 10-Year Framework of Programmes on Sustainable Consumption and Production, with developed countries taking the lead | Clean energy                  | Electric energy→access to affordable, reliable and modern energy for economic→economic growth from environmental degradation                  | (Hamududu and Killingtveit, 2012; IHA, 2018, 2020)           |
|                                                                                                                                                                                                                                                                                                                                      | Runoff regulation             | Runoff regulation→seasonal distribution of the water resources to increase the water use efficiency                                           | (Nusser et al., 2019)                                        |
|                                                                                                                                                                                                                                                                                                                                      | Research & Education          | Research & Education→utilization and management of cryosphere resources→improve economic growth from environmental degradation                | (Orlove et al., 2019; Rasul and Molden, 2019)                |
| <b>Target 8.5</b> By 2030, achieve full and productive employment and decent work for all women and men, including for young people and persons with disabilities, and equal pay for work of equal value                                                                                                                             | Aesthetic & Recreational      | Aesthetic & Recreational→the development of cryosphere tourism→achieve full and productive employment and decent work                         | (Blair, 2015; Konchar et al., 2015; Wang et al., 2010)       |
|                                                                                                                                                                                                                                                                                                                                      | Religious & Spirit & Cultural | Religious & Spirit & Cultural→the development of cryosphere tourism→achieve full and productive employment and decent work                    | (Becken et al., 2013)                                        |



|                                                                                                                                                   |                               |                                                                                                                                      |                                                                        |
|---------------------------------------------------------------------------------------------------------------------------------------------------|-------------------------------|--------------------------------------------------------------------------------------------------------------------------------------|------------------------------------------------------------------------|
| <b>Target 8.9</b> By 2030, devise and implement policies to promote sustainable tourism that creates jobs and promotes local culture and products | Aesthetic & Recreational      | Aesthetic appreciation and winter sports→promote sustainable cryosphere tourism→creates jobs and promotes local culture and products | (Sherpa et al., 2014; Spandre et al., 2019a, 2019b; Wang et al., 2010) |
|                                                                                                                                                   | Religious & Spirit & Cultural | Religious & Spirit & Cultural→cryosphere tourism development→creates jobs and promotes local culture and products                    | (Becken et al., 2013)                                                  |
|                                                                                                                                                   | Research & Education          | Research & Education→incorporating knowledge about cryosphere tourism to devise and implement policies→promote sustainable tourism   | (Cuerrier et al., 2015)                                                |

## Goal 9. Build resilient infrastructure, promote inclusive and sustainable industrialization and foster innovation

|                                                                                                                                                                                                                                                                                                                             |                      |                                                                                                                                                                                                       |                                                                                                |
|-----------------------------------------------------------------------------------------------------------------------------------------------------------------------------------------------------------------------------------------------------------------------------------------------------------------------------|----------------------|-------------------------------------------------------------------------------------------------------------------------------------------------------------------------------------------------------|------------------------------------------------------------------------------------------------|
| <b>Target 9.1</b> Develop quality, reliable, sustainable and resilient infrastructure, including regional and transborder infrastructure, to support economic development and human well-being, with a focus on affordable and equitable access for all                                                                     | Research & Education | Research & Education→enhance scientific research and technological capabilities of permafrost engineering→develop quality, reliable, sustainable and resilient infrastructure in frozen ground regime | (Auld et al., 2006; Cheng, 2005a, 2005b; Ma et al., 2009; Shi et al., 2012; Wang et al., 2020) |
|                                                                                                                                                                                                                                                                                                                             | Infra & Engineering  | Permafrost engineering supporting→quality, reliable, sustainable and resilient infrastructure                                                                                                         | (Chai et al., 2018; Guo and Wang, 2016; Lai et al., 2012; Xu et al., 2010; Yu et al., 2016)    |
| <b>Target 9.4</b> By 2030, upgrade infrastructure and retrofit industries to make them sustainable, with increased resource-use efficiency and greater adoption of clean and environmentally sound technologies and industrial processes, with all countries taking action in accordance with their respective capabilities | Infra & Engineering  | Permafrost engineering supporting→infrastructure construction (upgrade and sustainable retrofit infrastructure)                                                                                       | (Chai et al., 2018; Guo and Wang, 2016; Lai et al., 2012; Xu et al., 2010)                     |
|                                                                                                                                                                                                                                                                                                                             | Research & Education | Research & Education→enhance scientific research and technological capabilities of permafrost engineering→upgrade infrastructure in frozen ground regime                                              | (Bommer et al., 2010; Dore et al., 2016; Ma et al., 2009; Shi et al., 2012; Xu et al., 2010)   |

|                                                                                                                                                                   |                          |                                                                                                                                                                    |                                                                                  |
|-------------------------------------------------------------------------------------------------------------------------------------------------------------------|--------------------------|--------------------------------------------------------------------------------------------------------------------------------------------------------------------|----------------------------------------------------------------------------------|
| <b>Target 9.5</b> Enhance scientific research, upgrade the technological capabilities of industrial sectors                                                       | Research & Education     | Research & Education (cryosphere research)→enhance scientific research and technological capabilities of permafrost engineering                                    | (Gardner and Dekens, 2006; Ma et al., 2009; Shi et al., 2012; Wang et al., 2020) |
| <b>Goal 10. Reduce inequality within and among countries</b>                                                                                                      |                          |                                                                                                                                                                    |                                                                                  |
| <b>Target 10.1</b> By 2030, progressively achieve and sustain income growth of the bottom 40 percent of the population at a rate higher than the national average | Fresh water              | Meltwater→economic system (agriculture, husbandry and other industries)→achieve and sustain income growth of low-income people                                     | (Sherpa, 2014; Viviroli et al., 2020)                                            |
|                                                                                                                                                                   | Clean energy             | Electric energy (hydropower)→social economic system (economic and energy sectors)→provide employment opportunities for low-income people and increase their income | (Gaudard et al., 2016)                                                           |
|                                                                                                                                                                   | Ice & Snow materials     | Cryosphere resources→basis of cryosphere tourism→increase the income growth of low-income people                                                                   | (Blair, 2015; Wobus et al., 2017)                                                |
|                                                                                                                                                                   | Climate regulation       | Climate regulation→reduce the frequency of climate change hazards→ensure the economic stability→increasing the income growth                                       | (FAO, 2018; Najafi et al., 2019)                                                 |
|                                                                                                                                                                   | Runoff regulation        | Runoff regulation→seasonal water allocation (agricultural irrigation)→progressively achieve and sustain income growth                                              | (Nüsser and Baghel, 2016)                                                        |
|                                                                                                                                                                   | Aesthetic & Recreational | Aesthetic & Recreational→cryosphere tourism development→create employment and income opportunities for the poor                                                    | (Denning, 2014; Vanat, 2018, 2020)                                               |
|                                                                                                                                                                   | Infra & Engineering      | Permafrost engineering supporting→infrastructure construction (transportation, pipeline, etc)→economic development and increasing the income growth                | (Johnstone, 1981; Yang et al., 2019)                                             |
| <b>Target 10.7</b> Facilitate orderly, safe, regular and responsible migration and mobility of people, including through the                                      | Habitation               | Habitation→provide a stable environment for economic→progressively achieve and sustain income growth                                                               | (CAFF, 2013)                                                                     |
|                                                                                                                                                                   | Fresh water              | Meltwater→basic services for the livelihood (agriculture, husbandry, etc)→migration and mobility caused by meltwater                                               | (Nyima and Hopping, 2019; Prasain, 2018)                                         |
|                                                                                                                                                                   | Climate regulation       | Climate regulation→reduce the frequency of climate change hazards→reduce passive migration caused by climate-related disaster                                      | (FAO, 2018; Najafi et al., 2019)                                                 |

|                                                               |                         |                                                                                                                                                                 |                                                       |
|---------------------------------------------------------------|-------------------------|-----------------------------------------------------------------------------------------------------------------------------------------------------------------|-------------------------------------------------------|
| implementation of planned and well-managed migration policies | Runoff regulation       | Runoff regulation→seasonal water allocation (agricultural irrigation, etc)→reduce passive migration caused by insufficient meltwater                            | (Barnett et al., 2005; Rasul and Molden, 2019)        |
|                                                               | Hydrothermal regulation | Ecological regulation (hydrothermal regulation)→protect the agriculture and husbandry system→reduce passive migration caused by ecological disaster             | (Gentle and Thwaites, 2016; Ingty, 2017)              |
|                                                               | Research & Education    | Research & Education (cryosphere livelihoods)→impact assessment and coping strategies→facilitate orderly, safe, regular and responsible migration               | (SROCC, 2019)                                         |
|                                                               | Infra & Engineering     | Permafrost engineering supporting→infrastructure construction (building, transportation, etc)→strengthen capacity to avoid passive migration caused by disaster | (Duvillard et al., 2019; Phillips and Margreth, 2008) |
|                                                               | Habitation              | Habitation→provide a stable cryosphere environment for livelihood→avoid passive migration caused by climate-related disaster                                    | (Merrey et al., 2018; Mukherji et al., 2019)          |

### Goal 11. Make cities and human settlements inclusive, safe, resilient and sustainable

|                                                                                                                                 |                      |                                                                                                                                                                               |                                                            |
|---------------------------------------------------------------------------------------------------------------------------------|----------------------|-------------------------------------------------------------------------------------------------------------------------------------------------------------------------------|------------------------------------------------------------|
| <b>Target 11.1</b> By 2030, ensure access for all to adequate, safe and affordable housing and basic services and upgrade slums | Fresh water          | Meltwater resources→ensure access for all to adequate, safe and affordable freshwater                                                                                         | (Buytaert et al., 2017; Drenkhan et al., 2019)             |
|                                                                                                                                 | Clean energy         | Electric energy→ensure access for all to adequate, safe and affordable clean energy                                                                                           | (Hamududu and Killingtveit, 2012; IHA, 2018, 2020)         |
|                                                                                                                                 | Infra & Engineering  | Permafrost engineering supporting→infrastructure construction (adequate, safe and affordable housing) for all in frozen ground                                                | (Vincent et al., 2013)                                     |
|                                                                                                                                 | Climate regulation   | Climate regulation→reduce the frequency of climate-related diasaters→access to adequate, safe basic services                                                                  | (Barnett et al., 2005)                                     |
|                                                                                                                                 | Habitation           | Habitation→provide a stable environment for ecology and livelihood→ensure access to basic services                                                                            | (Jurt et al., 2015)                                        |
| <b>Target 11.2</b> By 2030, provide access to safe, affordable, accessible and sustainable                                      | Research & Education | Research & Education→enhance technological capabilities of permafrost engineering→develop quality, reliable, sustainable and resilient infrastructure in frozen ground regime | (Cheng, 2005a, 2005b; Ma et al., 2009; Shi et al., 2012)   |
|                                                                                                                                 | Research & Education | Research & Education (permafrost engineering)→risk management and engineering technology→access to safe and sustainable transport systems                                     | (Larsen et al., 2008; Shi et al., 2012; Wang et al., 2020) |

|                                                                                                                                                                           |                               |                                                                                                                                                        |                                                             |
|---------------------------------------------------------------------------------------------------------------------------------------------------------------------------|-------------------------------|--------------------------------------------------------------------------------------------------------------------------------------------------------|-------------------------------------------------------------|
| transport systems for all, improving road safety, notably by expanding public transport                                                                                   | Infra & Engineering           | Permafrost engineering supporting→infrastructure construction (road, railway, etc) for the sustainable transport systems                               | (Chai et al., 2018; Shi et al., 2012; Vincent et al., 2013) |
| <b>Target 11.4</b> Strengthen efforts to protect and safeguard the world's cultural and natural heritage                                                                  | Fresh water                   | Meltwater→protect and restore the ecosystems→protect and safeguard the culture and natural heritage related ecosystems                                 | (McNeeley, 2017)                                            |
|                                                                                                                                                                           | Ice & Snow materials          | Cryosphere resources (natural heritage carrier)→protect and safeguard the cryosphere cultural and natural heritage                                     | (Bosson et al., 2019; Konchar et al., 2015)                 |
|                                                                                                                                                                           | Climate regulation            | Climate regulation→reduce climate change and related impact to protect the natural heritage                                                            | (Rhoades et al., 2008)                                      |
|                                                                                                                                                                           | Hydrothermal regulation       | Ecological regulation (hydrothermal regulation)→protect and safeguard the natural heritage                                                             | (Urban et al., 2014; Woo and Young, 2014)                   |
|                                                                                                                                                                           | Research & Education          | Research & Education (cryosphere cultural values)→environment awareness to protect and safeguard the natural heritage                                  | (Bosson et al., 2019; SROCC, 2019)                          |
|                                                                                                                                                                           | Religious & Spirit & Cultural | Cryosphere religious and cultural→strengthen efforts to protect and safeguard the world's cultural and natural heritage                                | (Bosson et al., 2019; Callanan, 2016; UNESCO, 2012)         |
|                                                                                                                                                                           | Aesthetic & Recreational      | Aesthetic & recreational (climate change tourism)→envrionment awareness to protect and safeguard the world's cultural and natural heritage             | (Garavaglia, 2012; Garavaglia and Pelfini, 2011)            |
|                                                                                                                                                                           | Infra & Engineering           | Permafrost engineering supporting→infrastructure construction→protect and safeguard the cultural and natural heritage                                  | (Chai et al., 2018; Vincent et al., 2013)                   |
| <b>Target 11.5</b> By 2030, significantly reduce the number of deaths and the number of people affected and substantially decrease the direct economic losses relative to | Habitation                    | Habitation→provide a stable environment for socio-ecosystemt (carrier of the spiritual and intrinsic)→protect cryosphere cultural and natural heritage | (Oliversmith, 1979; Tschakert et al., 2019)                 |
|                                                                                                                                                                           | Fresh water                   | Meltwater resources→mitigating disasters caused by water shortage→decrease the economic losses caused by water-related disasters                       | (Gentle and Thwaites, 2016)                                 |
|                                                                                                                                                                           | Climate regulation            | Climate regulation→decrease the economic losses and the number of deaths affect by climate change hazards                                              | (FAO, 2018)                                                 |

|                                                                                                                                                                                                                                                                              |                          |                                                                                                                                                               |                                                       |
|------------------------------------------------------------------------------------------------------------------------------------------------------------------------------------------------------------------------------------------------------------------------------|--------------------------|---------------------------------------------------------------------------------------------------------------------------------------------------------------|-------------------------------------------------------|
| global gross domestic product caused by disasters, with a focus on protecting the poor and people in vulnerable situations                                                                                                                                                   | Runoff regulation        | Runoff regulation→seasonal water allocation for economic system→decrease the economic losses caused by water-related disasters                                | (Wrathall et al., 2014)                               |
|                                                                                                                                                                                                                                                                              | Research & Education     | Research & Education (permafrost engineering)→building sustainable and resilient buildings→reduce the affect and economic losses caused by disasters          | (Doré et al., 2016)                                   |
|                                                                                                                                                                                                                                                                              | Infra & Engineering      | Permafrost engineering supporting→infrastructure construction→improve the ability to resist disasters and reduce economic losses                              | (Walker and Peirce, 2015)                             |
|                                                                                                                                                                                                                                                                              | Habitation               | Habitation→provide a stable environment for livelihood→reduce immigration and the economic losses                                                             | (IHCAP, 2017; Nothiger and Elsasser, 2004)            |
| <b>Target 11.6</b> By 2030, reduce the adverse per capita environmental impact of cities, including by paying special attention to air quality and municipal and other waste management                                                                                      | Environmental regulation | Environmental regulation→reduce environmental contaminants (organic, inorganic, etc) impact of cities                                                         | (Bogdal et al., 2010; Hodson, 2014)                   |
|                                                                                                                                                                                                                                                                              | Research & Education     | Research & Education (cryosphere environment)→environmental awareness and actions→reduce the adverse environment impact of cities                             | (Milner et al., 2017)                                 |
| <b>Target 11.b</b> By 2020, substantially increase the number of cities and human settlements adopting and implementing integrated policies and plans to climate change, resilience to disasters, and develop and implement, holistic disaster risk management at all levels | Research & Education     | Research & Education (permafrost engineering)→improve the engineering to respond to cryosphere changes→increase the resilience apacity to disasters           | (Dore et al., 2016; Hill et al., 2017)                |
|                                                                                                                                                                                                                                                                              | Infra & Engineering      | Permafrost engineering supporting→infrastructure construction (building, road, dam, etc) to increase the sustainable cities and settlements to climate change | (Walker and Peirce, 2015)                             |
| <b>Target 11.c</b> Support least developed countries, including through financial and technical assistance, in building sustainable and resilient buildings utilizing local materials                                                                                        | Infra & Engineering      | Permafrost engineering supporting→support for sustainable and resilient buildings                                                                             | (Duvillard et al., 2019; Phillips and Margreth, 2008) |
|                                                                                                                                                                                                                                                                              | Research & Education     | Research & Education (permafrost engineering)→improve the engineering technical→technical assistance to build the sustainable buildings                       | (Bommer et al., 2010; Doré et al., 2016)              |

## Goal 12. Ensure sustainable consumption and production patterns

|                                                                                                                                                                                           |                               |                                                                                                                                                                 |                                                                                                   |
|-------------------------------------------------------------------------------------------------------------------------------------------------------------------------------------------|-------------------------------|-----------------------------------------------------------------------------------------------------------------------------------------------------------------|---------------------------------------------------------------------------------------------------|
| <b>Target 12.2</b> By 2030, achieve the sustainable management and efficient use of natural resources                                                                                     | Fresh water                   | Meltwater resources→achieve the sustainable use of natural resources in economic system (agriculture, husbandry and tourism)                                    | (Barnett et al., 2005; Becken et al., 2013)                                                       |
|                                                                                                                                                                                           | Clean energy                  | Hydropower→achieve the sustainable management and efficient use of cryosphere natural resources                                                                 | (Hamududu and Killingtveit, 2012; IHA, 2018, 2020)                                                |
|                                                                                                                                                                                           | Ice & Snow materials          | Ice & Snow materials→achieve the sustainable management and efficient use of natural resources for cryosphere tourism                                           | (Blair, 2015; Hagenstad et al., 2018; Vanat, 2018, 2020)                                          |
|                                                                                                                                                                                           | Climate regulation            | Climate regulation→maintain the stability of the cryosphere resources→improve the sustainable management and efficient use of natural resources                 | (Hoegh-Guldberg et al., 2018; Scott et al., 2018; Steiger et al., 2017)                           |
|                                                                                                                                                                                           | Runoff regulation             | Runoff regulation→seasonal allocation of water resources to achieve the sustainable use of water resources                                                      | (Braun and Fournier, 2016)                                                                        |
|                                                                                                                                                                                           | Research & Education          | Research & Education→sustainable management and efficient use of cryosphere resources                                                                           | (Scott et al., 2015)                                                                              |
|                                                                                                                                                                                           | Aesthetic & Recreational      | Aesthetic & Recreational→cryosphere tourism development→achieve the sustainable management and efficient use of cryosphere resources                            | (Denning, 2014; Hagenstad et al., 2018; Vanat, 2018, 2020)                                        |
|                                                                                                                                                                                           | Religious & Spirit & Cultural | Cryosphere religious and cultural→cultural heritage value and development utilization→achieve the sustainable management and efficient use of natural resources | (Serdeczny, 2019; UNFCCC, 2014)                                                                   |
| <b>Target 12.3</b> By 2030, halve per capita global food waste at the retail and consumer levels and reduce food losses along production and supply chains, including post-harvest losses | Infra & Engineering           | Permafrost engineering supporting→infrastructure construction→ensure sustainable management and efficient use of natural resources                              | (Guo and Wang, 2016; Yu et al., 2016)                                                             |
|                                                                                                                                                                                           | Fresh water                   | Meltwater→agricultural irrigation→reduce the frequency of water-related hazards→reduce food losses along production                                             | (Barrett and Bosak, 2018; Biemans et al., 2019; Nüsser and Schmidt, 2017; Rasul and Molden, 2019) |
|                                                                                                                                                                                           | Climate regulation            | Climate regulation→reduce the frequency of climate change hazards and pests and diseases→reduce food losses along production                                    | (FAO, 2018)                                                                                       |

|                                                                                                                                                                                                                                                                                                        |                               |                                                                                                                                                |                                                |
|--------------------------------------------------------------------------------------------------------------------------------------------------------------------------------------------------------------------------------------------------------------------------------------------------------|-------------------------------|------------------------------------------------------------------------------------------------------------------------------------------------|------------------------------------------------|
|                                                                                                                                                                                                                                                                                                        | Runoff regulation             | Runoff regulation→seasonal water allocation for irrigation→ensure sustainable food production systems,reduce food losses along production      | (Nüsser et al., 2019; Nüsser and Baghel 2016)  |
|                                                                                                                                                                                                                                                                                                        | Hydrothermal regulation       | Ecological regulation (hydrothermal)→stable agricultural ecological system→protect agricultural output and reduce food losses along production | (Qin et al., 2020; Smadja et al., 2015)        |
| <b>Target 12.4</b> By 2020, achieve the environmentally sound management of chemicals and all wastes, in accordance with agreed international frameworks, and significantly reduce their release to air, water and soil in order to minimize their adverse impacts on human health and the environment | Environmental regulation      | Environmental regulation (contaminents reserve)→reduce contaminants release to environment and minimize the impacts on health                  | (Douglas et al., 2012; Zaharescu et al., 2016) |
|                                                                                                                                                                                                                                                                                                        | Research & Education          | Research & Education→cryosphere contaminants circulate and enrich→minimize the impacts on health and environment                               | (Langford et al., 2010)                        |
|                                                                                                                                                                                                                                                                                                        | Infra & Engineering           | Permafrost engineering supporting→infrastructure construction (wastes storage)→minimize the impacts on health and environment                  | (Yang et al., 2007)                            |
| <b>Target 12.8</b> By 2030, ensure that people everywhere have the relevant information and awareness for sustainable development and lifestyles in harmony with nature                                                                                                                                | Research & Education          | Research & Education→improve the awareness of sustainable development and lifestyles in harmony with nature                                    | (IPCC, 2014c, 2019; SROCC, 2019)               |
|                                                                                                                                                                                                                                                                                                        | Aesthetic & Recreational      | Aesthetic & Recreational→cryosphere tourism sustainable development in harmony with nature                                                     | (Stewart et al., 2016; Wang et al., 2010)      |
|                                                                                                                                                                                                                                                                                                        | Religious & Spirit & Cultural | Cryosphere religious and cultural→awareness for sustainable development and lifestyles in harmony with nature                                  | (Serdeczny, 2019; UNFCCC, 2014)                |
| <b>Target 12.a</b> Support developing countries to strengthen their scientific and technological capacity to move towards more sustainable patterns of consumption and production                                                                                                                      | Research & Education          | Research & Education (cryosphere sustainable development)→strengthen the scientific and technological capacity to the sustainable development  | (IPCC, 2014a, 2014b; IPCC, 2018; SROCC, 2019)  |
| <b>Target 12.b</b> Develop and implement tools to monitor sustainable development                                                                                                                                                                                                                      | Ice & Snow materials          | Ice & Snow materials (cryosphere tourism resources)→creates jobs and promotes local sustainable tourism                                        | (Vanat, 2018, 2020)                            |

|                                                                                           |                               |                                                                                                                         |                                           |
|-------------------------------------------------------------------------------------------|-------------------------------|-------------------------------------------------------------------------------------------------------------------------|-------------------------------------------|
| impacts for sustainable tourism that creates jobs and promotes local culture and products | Religious & Spirit & Cultural | Cryosphere religious and cultural services→promotes sustainable tourism and creates jobs                                | (Xiao et al., 2019)                       |
|                                                                                           | Aesthetic & Recreational      | Aesthetic appreciation and recreational services (climate change tourism)→creates jobs and promotes sustainable tourism | (Stewart et al., 2016; Wang et al., 2010) |

### Goal 13. Take urgent action to combat climate change and its impacts

|                                                                                                                                  |                               |                                                                                                                                                     |                                                       |
|----------------------------------------------------------------------------------------------------------------------------------|-------------------------------|-----------------------------------------------------------------------------------------------------------------------------------------------------|-------------------------------------------------------|
| <b>Target 13.1</b> Strengthen resilience and adaptive capacity to climate-related hazards and natural disasters in all countries | Fresh water                   | Meltwater for social ecological and economic systems→strengthen resilience and adaptive capacity to the drought disaster                            | (Pritchard, 2019; Wu et al., 2015)                    |
|                                                                                                                                  | Runoff regulation             | Runoff regulation→seasonal allocation of water resources to strengthen the capacity to the climate-related disaster                                 | (Hussain et al., 2018; Huss and Hock, 2018)           |
|                                                                                                                                  | Climate regulation            | Climate regulation→mitigate global warming and climate-related hazards and natural disasters in all countries                                       | (Matthes et al., 2015; Mu et al., 2017)               |
|                                                                                                                                  | Hydrothermal regulation       | Ecological regulation (hydrothermal regulation)→mitigating the impact of climate change on ecology                                                  | (Yang et al., 2018; Zhang et al., 2011)               |
|                                                                                                                                  | Research & Education          | Research & Education→risk awareness of cryosphere changes and impact→strengthen capacity to climate-related hazards                                 | (SWIPA, 2017; SROCC, 2019)                            |
|                                                                                                                                  | Infra & Engineering           | Permafrost engineering supporting→infrastructure construction(dam, etc) to strengthen capacity to climate-related hazards and natural disasters     | (Duvillard et al., 2019; Phillips and Margreth, 2008) |
| <b>Target 13.2</b> Integrate climate change measures into national policies, strategies and planning                             | Habitation                    | Habitation→provide a stable environment for livelihood→strengthen resilience and adaptive capacity to climate-related hazards and natural disasters | (Rasmussen, 2016)                                     |
|                                                                                                                                  | Climate regulation            | Climate regulation→mitigate global warming and climate-related disasters→integrate into national policies, strategies and planning                  | (SROCC, 2019)                                         |
|                                                                                                                                  | Research & Education          | Research & Education (cryosphere changes and impact)→strengthen awareness and capacity→integrate measures into policies, strategies and planning    | (IPCC, 2014, 2019; Lepage and Dore, 2010)             |
|                                                                                                                                  | Religious & Spirit & Cultural | Cryosphere religious and cultural→cryosphere culture resources protection→integrate measure into national policies, strategies and planning         | (Schirpke et al., 2016)                               |



|                                                                                                                                                                           |                               |                                                                                                                                                      |                                                        |
|---------------------------------------------------------------------------------------------------------------------------------------------------------------------------|-------------------------------|------------------------------------------------------------------------------------------------------------------------------------------------------|--------------------------------------------------------|
| <b>Target 13.3</b> Improve education, awareness-raising and human and institutional capacity on climate change mitigation, adaptation, impact reduction and early warning | Climate regulation            | Climate regulation→mitigate global warming and climate-related disasters→improve capacity on climate change mitigation, adaptation, impact reduction | (Rasmussen, 2016)                                      |
|                                                                                                                                                                           | Research & Education          | Research & Education (cryosphere changes and impact)→improve education, awareness-raising and human and institutional capacity on climate change     | (IPCC, 2014, 2019; Lepage and Dore, 2010; SWIPA, 2017) |
|                                                                                                                                                                           | Religious & Spirit & Cultural | Religious & Spirit & Cultural (indigenous/local knowledge tied to religious beliefs)→improve education, awareness-raising on climate change          | (Brugger et al., 2013; Mark et al., 2010)              |

#### Goal 14. Conserve and sustainably use the oceans, seas and marine resources for sustainable development

|                                                                                                                                                                                                                                                                     |                          |                                                                                                                                                     |                                                  |
|---------------------------------------------------------------------------------------------------------------------------------------------------------------------------------------------------------------------------------------------------------------------|--------------------------|-----------------------------------------------------------------------------------------------------------------------------------------------------|--------------------------------------------------|
| <b>Target 14.1</b> By 2025, prevent and significantly reduce marine pollution of all kinds, in particular from landbased activities, including marine debris and nutrient pollution                                                                                 | Runoff regulation        | Runoff regulation→regulate the meltwater and contaminants into ocean→prevent and significantly reduce marine pollution                              | (AMAP, 2017; Peterson et al., 2002)              |
|                                                                                                                                                                                                                                                                     | Climate regulation       | Climate regulation→mitigate global warming and climate-related impacts→reducing the impact on marine and coastal ecosystems                         | (Gobler, 2020; Wassmann, 2011)                   |
|                                                                                                                                                                                                                                                                     | Environmental regulation | Environmental regulation (concentrate and circulate)→regulate contaminant to the marine and coastal ecosystems                                      | (Douglas et al., 2012; Sun et al., 2017, 2018)   |
|                                                                                                                                                                                                                                                                     | Research & Education     | Research & Education (cryosphere nutrients, contaminants concentrate and circulate)→protect the environment and reduce pollution from rivers        | (Ask et al., 2009; Rautio et al., 2011)          |
| <b>Target 14.2</b> By 2020, sustainably manage and protect marine and coastal ecosystems to avoid significant adverse impacts, including by strengthening their resilience, and take action for their restoration in order to achieve healthy and productive oceans | Runoff regulation        | Runoff regulation→regulate the meltwater and related material into ocean→protect marine and coastal ecosystems to avoid significant adverse impacts | (AMAP, 2017; Greene et al., 2008; Michael, 2021) |
|                                                                                                                                                                                                                                                                     | Climate regulation       | Climate regulation→mitigate global warming and significant climate-related impacts→sustainably manage and protect marine and coastal ecosystems     | (Wassmann, 2011)                                 |
|                                                                                                                                                                                                                                                                     | Research & Education     | Research & Education→the concentration and circulation of cryosphere nutrients, contaminants to the marine→protect marine and coastal ecosystems    | (Hawkings et al., 2016; SROCC, 2019)             |
| <b>Target 14.3</b> Minimize and address the impacts of ocean acidification, including                                                                                                                                                                               | Runoff regulation        | Runoff regulation→regulate the meltwater and organic carbon into ocean→conserve coastal and marine areas                                            | (Spencer et al., 2009)                           |

|                                                                                                                                                                                                     |                      |                                                                                                                                           |                                         |
|-----------------------------------------------------------------------------------------------------------------------------------------------------------------------------------------------------|----------------------|-------------------------------------------------------------------------------------------------------------------------------------------|-----------------------------------------|
| through enhanced scientific cooperation at all levels                                                                                                                                               | Climate regulation   | Climate regulation→mitigate global warming and the meltwater into the arctic marine→minimize the impacts of ocean acidification           | (Oschlies, 2021; Peterson et al., 2002) |
|                                                                                                                                                                                                     | Research & Education | Research & Education→(cryosphere changes affect ocean acidification)→awareness,strategies and methods to minimize the ocean acidification | (SROCC, 2019; SWIPA, 2017)              |
| <b>Target 14.5</b> By 2020, conserve at least 10 percent of coastal and marine areas, consistent with national and international law and based on the best available scientific information         | Runoff regulation    | Runoff regulation→regulate the meltwater and nutrient into ocean→conserve coastal and marine areas                                        | (AMAP, 2017; Peterson et al., 2002)     |
|                                                                                                                                                                                                     | Climate regulation   | Climate regulation→mitigate global warming and climate-related disasters→conserve coastal and marine areas                                | (Wassmann, 2011)                        |
|                                                                                                                                                                                                     | Research & Education | Research & Education→the impact of the cryosphere changes to marine system→conserve coastal and marine areas                              | (Hawkings et al., 2016; SROCC, 2019)    |
| <b>Target 14.c</b> Enhance the conservation and sustainable use of oceans and their resources by implementing international law as reflected in the United Nations Convention on the Law of the Sea | Climate regulation   | Climate regulation→mitigate global warming and climate-related disasters→enhance the conservation and sustainable use of oceans           | (Wassmann, 2011)                        |
|                                                                                                                                                                                                     | Research & Education | Research & Education→the awareness of marine environment with cryosphere change→enhance the conservation and sustainable use of oceans    | (Ask et al., 2009; Rautio et al., 2011) |

### Goal 15. Protect, restore and promote sustainable use of terrestrial ecosystems, sustainably manage forests, combat desertification, and halt and reverse land degradation and halt biodiversity loss

|                                                                                                                                                                                                                                                                           |                         |                                                                                                                            |                                                                         |
|---------------------------------------------------------------------------------------------------------------------------------------------------------------------------------------------------------------------------------------------------------------------------|-------------------------|----------------------------------------------------------------------------------------------------------------------------|-------------------------------------------------------------------------|
| <b>Target 15.1</b> By 2020, ensure the conservation, restoration and sustainable use of terrestrial and inland freshwater ecosystems and their services, in particular forests, wetlands, mountains and drylands, in line with obligations under international agreements | Fresh water             | Meltwater→ensure the conservation, restoration and sustainable use of freshwater ecosystems and services                   | (Hawkings et al., 2014; Stuefer and Kane, 2016)                         |
|                                                                                                                                                                                                                                                                           | Runoff regulation       | Runoff regulation→seasonal allocation of ecological water to ensure the sustainable of freshwater ecosystems and services  | (Giersch et al, 2015, 2017; Hawkings et al., 2014; Lawson et al., 2014) |
|                                                                                                                                                                                                                                                                           | Climate regulation      | Climate regulation (radiative forcing)→ensure the conservation, restoration and sustainable use of ecosystems and services | (Hoegh-Guldberg, 2018; Milner et al., 2017)                             |
|                                                                                                                                                                                                                                                                           | Hydrothermal regulation | Ecological regulation (hydrothermal regulation)→ensure the sustainable use of ecosystems and services                      | (Urban et al., 2014; Woo and Young, 2014; Zhao et al., 2018)            |

|                                                                                                                                                                                                                            |                               |                                                                                                                                                            |                                                             |
|----------------------------------------------------------------------------------------------------------------------------------------------------------------------------------------------------------------------------|-------------------------------|------------------------------------------------------------------------------------------------------------------------------------------------------------|-------------------------------------------------------------|
|                                                                                                                                                                                                                            | Research & Education          | Research & Education→cryosphere changes and impact to ecosystems→ensure the conservation and sustainable use of ecosystems and services                    | (Rosvold, 2016)                                             |
|                                                                                                                                                                                                                            | Aesthetic & Recreational      | Aesthetic & recreational (climate change tourism)→envrionment awareness and protection→ensure the sustainable use of freshwater and terrestrial ecosystems | (Garavaglia et al., 2012; Garavaglia and Pelfini, 2011)     |
|                                                                                                                                                                                                                            | Religious & Spirit & Cultural | Cryosphere religious and cultural→protect freshwater ecosystems related culture→ensure the sustainable of freshwater ecosystems and services               | (Allison 2015)                                              |
|                                                                                                                                                                                                                            | Habitation                    | Habitation→provide a stable environment for freshwater ecosystems→ensure the sustainable of freshwater ecosystems and their services                       | (Cooper, 2014; Giersch et al., 2017; Milner et al., 2017)   |
| <b>Target 15.2</b> By 2020, promote the implementation of sustainable management of all types of forests, halt deforestation, restore degraded forests and substantially increase afforestation and reforestation globally | Fresh water                   | Meltwater→promote the implementation of sustainable management of forests and their services                                                               | (Jamir, 2016; Yang et al., 2014)                            |
|                                                                                                                                                                                                                            | Runoff regulation             | Runoff regulation→seasonal allocation of ecological water to ensure the sustainable of freshwater ecosystems and services                                  | (Sun et al., 2016)                                          |
|                                                                                                                                                                                                                            | Climate regulation            | Climate regulation→ensure the conservation, restoration and sustainable use of freshwater ecosystems and services                                          | (Dobrowski and Parks, 2016)                                 |
|                                                                                                                                                                                                                            | Hydrothermal regulation       | Ecological regulation (hydrothermal)→promote the implementation of sustainable management of forests and their services                                    | (Shen et al., 2018; Wang et al., 2017; Zhang et al., 2020)  |
|                                                                                                                                                                                                                            | Research & Education          | Research & Education→cryosphere changes and impact to ecosystems→promote the implementation of sustainable management of forests                           | (Jones et al., 2018; Mills et al., 2018)                    |
|                                                                                                                                                                                                                            | Religious & Spirit & Cultural | Cryosphere religious and cultural→protect mountain culture→ensure the sustainable of freshwater ecosystems and services                                    | (Rosvold, 2016)                                             |
|                                                                                                                                                                                                                            | Habitation                    | Habitation→provide a stable environment to prevent forests ecosystem                                                                                       | (Gentili et al., 2015; Panetta et al., 2018; Rosvold, 2016) |
| <b>Target 15.3</b> By 2030, combat desertification, restore degraded land and soil, including land affected by desertification, drought and floods, and                                                                    | Fresh water                   | Meltwater (ecosystem water)→combat desertification, restore degraded land and soil                                                                         | (Pritchard, 2019; Woo and Young, 2014)                      |
|                                                                                                                                                                                                                            | Runoff regulation             | Runoff regulation (seasonal allocation of ecological water)→mitigate the seasonal drought of the land affected by desertification and drought diseaster    | (Woo and Young, 2014)                                       |

|                                                                                                                                                                                                                 |                               |                                                                                                                                                          |                                                                                                   |
|-----------------------------------------------------------------------------------------------------------------------------------------------------------------------------------------------------------------|-------------------------------|----------------------------------------------------------------------------------------------------------------------------------------------------------|---------------------------------------------------------------------------------------------------|
| strive to achieve a land degradation-neutral world                                                                                                                                                              | Climate regulation            | Climate regulation→mitigate ecological changes to combat desertification, restore degraded land and soil                                                 | (Gao et al., 2015; Zhang et al., 2011)                                                            |
|                                                                                                                                                                                                                 | Hydrothermal regulation       | Ecological regulation (hydrothermal)→prevent the land ecosystem to avoid the degradation (ground thermal regime)                                         | (Blok et al., 2015; Dhakar and Pandey, 2020; Harpold and Molotch, 2015; Leffler and Welker, 2013) |
|                                                                                                                                                                                                                 | Religious & Spirit & Cultural | Cryosphere religious and cultural→protect culture related mountain cryosphere→protects land system to avoid the degradation                              | (Allison 2015)                                                                                    |
|                                                                                                                                                                                                                 | Research & Education          | Research & Education→cryosphere changes and impact to ecosystems→protect the soil properties and minimize the land degradation                           | (Leffler, 2016; Zhou, 2013a, 2013b)                                                               |
|                                                                                                                                                                                                                 | Habitation                    | Habitation→provide a stable environment to prevent the desertification, restore degraded land and soil (i.e. ground thermal regime, soil organic carbon) | (Paudel, 2010)                                                                                    |
| <b>Target 15.4</b> By 2030, ensure the conservation of mountain ecosystems, including their biodiversity, in order to enhance their capacity to provide benefits that are essential for sustainable development | Fresh water                   | Meltwater (ecosystems water resource)→ensure the conservation of mountain ecosystems                                                                     | (Luus et al., 2013; Pritchard, 2019)                                                              |
|                                                                                                                                                                                                                 | Runoff regulation             | Runoff regulation→seasonal allocation of ecological water to conserve mountain ecosystems                                                                | (Sun et al., 2016)                                                                                |
|                                                                                                                                                                                                                 | Climate regulation            | Climate regulation→mitigate global warming and climate-driven disaster→ensure the conservation of mountain ecosystems                                    | (Brugger et al., 2013; Serreze and Barry 2011)                                                    |
|                                                                                                                                                                                                                 | Hydrothermal regulation       | Hydrothermal regulation (high albedo, low thermal conductivity)→ensure the conservation of mountain ecosystems (ground thermal regime)                   | (Kissel et al., 2019; Semenchuk et al., 2013; Zhao et al., 2018)                                  |
|                                                                                                                                                                                                                 | Research & Education          | Research & Education→cryosphere changes and impact to ecosystems→effects and strategies to conserve mountain ecosystems                                  | (Rasul et al., 2019; SROCC, 2019)                                                                 |
|                                                                                                                                                                                                                 | Aesthetic & Recreational      | Aesthetic & recreational (climate change tourism)→environment awareness→ensure the conservation of mountain ecosystems                                   | (Garavaglia et al., 2012; Garavaglia and Pelfini, 2011)                                           |
|                                                                                                                                                                                                                 | Religious & Spirit & Cultural | Cryosphere religious and cultural→protect the nature resources→ensure the conservation of mountain ecosystems                                            | (Allison 2015)                                                                                    |

|                                                                                                                                                                                                           |                               |                                                                                                                                                                       |                                                                                                        |
|-----------------------------------------------------------------------------------------------------------------------------------------------------------------------------------------------------------|-------------------------------|-----------------------------------------------------------------------------------------------------------------------------------------------------------------------|--------------------------------------------------------------------------------------------------------|
|                                                                                                                                                                                                           | Habitation                    | Habitation→provide a stable natural habitats→ensure the conservation and sustainable development of mountain ecosystems                                               | (Gentili et al., 2015; IHCAP, 2017)                                                                    |
| <b>Target 15.5</b> Take urgent and significant action to reduce the degradation of natural habitats, halt the loss of biodiversity and, by 2020, protect and prevent the extinction of threatened species | Fresh water                   | Meltwater(soil moisture,habitats)→reduce the degradation of natural habitats and biodiversity                                                                         | (Luus et al., 2013)                                                                                    |
|                                                                                                                                                                                                           | Runoff regulation             | Runoff regulation→seasonal allocation of ecological water→reduce the degradation of natural habitats and biodiversity                                                 | (Sun et al., 2016; Wilhelm et al., 2013)                                                               |
|                                                                                                                                                                                                           | Climate regulation            | Climate regulation→maintain the ecological habitat and reduce the degradation of natural habitats and biodiversity                                                    | (Wheeler et al., 2015, 2016)                                                                           |
|                                                                                                                                                                                                           | Hydrothermal regulation       | Ecological regulation (hydrothermal effect, season length)→reduce the degradation of natural habitats and biodiversity (i.e. soil temperature, environmental changes) | (Semenchuk et al., 2019; Zhang et al., 2021)                                                           |
|                                                                                                                                                                                                           | Research & Education          | Research & Education→cryosphere changes and impact to ecosystems (i.e. soil temperatures)→take action to reduce the degradation of natural habitats and biodiversity  | (Bjorkman et al., 2015; Goncharova et al., 2019; Zhang et al., 2021)                                   |
|                                                                                                                                                                                                           | Aesthetic & Recreational      | Aesthetic & recreational (climate change tourism)→envrionment awareness→take action to reduce the degradation of natural habitats                                     | (Garavaglia et al., 2012; Garavaglia and Pelfini, 2011)                                                |
|                                                                                                                                                                                                           | Religious & Spirit & Cultural | Cryosphere religious and cultural→protection of the nature resources→reduce the degradation of natural habitats and biodiversity                                      | (Allison, 2015; Gagne et al., 2014)                                                                    |
|                                                                                                                                                                                                           | Habitation                    | Habitation (cold conditions, stable environment)→protect natural habitats and reduce the degradation of biodiversity                                                  | (Dhakar and Pandey, 2020; Fauteux et al., 2015; Ingty, 2017; White et al., 2018; Wilhelm et al., 2013) |
| <b>Target 15.9</b> By 2020, integrate ecosystem and biodiversity values into national and local planning, development processes, poverty reduction strategies and accounts                                | Research & Education          | Research & Education→cryosphere services value research→integrate cryosphere services values into national and local planning                                         | (Wang et al., 2019; Xiao et al., 2016, 2019)                                                           |
|                                                                                                                                                                                                           | Religious & Spirit & Cultural | Cryosphere religious and cultural→awareness to protect the nature resources→integrate cryosphere services values into planning                                        | (Allison, 2015)                                                                                        |

## Table S5 references for SDGs linked to the cryosphere service

### Goal 1. End poverty in all its forms everywhere

- Biemans, H.; Siderius, C.; Lutz, A.F.; Nepal, S.; Ahmad, B.; Hassan, T.; Bloh, W.V.; Wijngaard, R.R.; Wester, P.; Shrestha, A.B.; Immerzeel, W.W. Importance of snow and glacier meltwater for agriculture on the Indo-Gangetic Plain. *Nat. Sustain.* **2019**, *2*, 594-601. <https://doi.org/10.1038/s41893-019-0305-3>.
- Blair, L.; Factoring climate change into recreation investment decisions: Evidence from Hatcher's Pass, Alaska. *Symposium of University Research and Creative Expression (SOURCE)* **2015**. 94.
- Burgess, A.S. Permafrost engineering design and construction. *Can. J. Civil Eng.* **1981**, *8*, 406-407. <https://doi.org/10.1139/l81-053>.
- Bury, J.; Mark, B.J.; Carey, M.; Young, K.R.; McKenzie, Jeff.; Baraer, Michel.; French, Adam.; Polk M.H. New geographies of water and climate change in Peru: Coupled natural and social transformations in the Santa river watershed. *Ann. Assoc. Am. Geogr.* **2013**, *103*, 363-374. <https://doi.org/10.1080/00045608.2013.754665>.
- Dangi, M.B.; Chaudhary, R.P.; Rijal, K.; Stahl, P.D.; Belbase, S.; Gerow, K.G.; Fernandez, D.; Pyakurel, B. Impacts of environmental change on agroecosystems and livelihoods in annapurna conservation area, Nepal. *Environ. Dev.* **2017**, *25*, 59-72. <https://doi.org/10.1016/j.envdev.2017.10.001>.
- Dore, G.; Niu, F.; Brooks, H. Adaptation methods for transportation infrastructure built on degrading permafrost. *Permafrost Periglac.* **2016**, *27*, 352-364. <https://doi.org/10.1002/ppp.1919>.
- Gaudard, L.; Gabbi, J.; Bauder, A.; Romerio, F. Long-term uncertainty of hydropower revenue due to climate change and electricity prices. *Water Resour. Manag.* **2016**, *30*, 1325-1343. <https://doi.org/10.1007/s11269-015-1216-3>.
- Hallegatte, S.; Fay, M.; Barbier, E.B. Poverty and climate change: introduction. *Environ. Dev. Econ.* **2018**, *23*, 217-233. <https://doi.org/10.1017/S1355770X18000141>.
- Huss, M.; Bookhagen, B.; Huggel, C.; Jacobsen, D.; Bradley, R.S.; Clague, J.J.; Vuille, M.; Buytaert, W.; Cayan, D.R.; Greenwood, G.; Mark, B.G.; Milner, A.M.; Weingartner, R.; Winder, M. Toward mountains without permanent snow and ice. *Earth's Future* **2017**, *5*, 418-435. <https://doi.org/10.1002/2016EF000514>.
- Johnston, G.H. Permafrost-engineering design and construction. *Cold Reg. Sci. Technol.* **1982**, *6*, 179-179. [https://doi.org/10.1016/0013-7952\(83\)90037-6](https://doi.org/10.1016/0013-7952(83)90037-6).
- Nüsser, M.; Baghel, R. Local knowledge and global concerns: Artificial glaciers as a focus of environmental knowledge and development interventions. In: *Ethnic and cultural dimensions of knowledge*. Springer, Cham. **2016**. [https://doi.org/10.1007/978-3-319-21900-4\\_9](https://doi.org/10.1007/978-3-319-21900-4_9).
- Nuesser, M.; Dame, J.; Kraus, B.; Baghel, R.; Schmidt, S. Socio-hydrology of "artificial glaciers" in Ladakh, India: Assessing adaptive strategies in a changing cryosphere. *Reg. Environ. Change* **2019**, *19*, 1327-1337. <https://doi.org/10.1007/s10113-018-1372-0>.
- Parveen, S.; Baghel, R. Irrigation in upper hunza: Evolution of socio-hydrological interactions in the Karakoram, Northern Pakistan. *Erdkunde* **2015**, *69*, 69-85.

<https://www.jstor.org/stable/24365265>.

- Prasain, S. Climate change adaptation measure on agricultural communities of Dhye in Upper Mustang, Nepal. *Climatic Change* **2018**, *148*, 279-291. <https://doi.org/10.1007/s10584-018-2187-1>.
- Qin, Y.; Abatzoglou, J.T.; Siebert, S.; Huning, L.S.; AghaKouchak, A.; Mankin, J.S.; Hong, C.; Tong, D.; Davis, S.J.; Mueller, N.D. Agricultural risks from changing snowmelt. *Nat. Clim. Change* **2020**, *10*, 459-465. <https://doi.org/10.1038/s41558-020-0746-8>.
- Rasmussen, B.M. Unsettling times: Living with the changing horizons of the Peruvian Andes. *Lat. Am. Perspect.* **2015**, *43*, 73-86. <https://doi.org/10.1177/0094582X16637867>.
- Reyer, C.; Otto, I.M.; Adams, S.; Albrecht, T.; Baarsch, F.; Carlsburg, M.; Coumou, D.; Eden, A.; Ludi, E.; Marcus, R.; Mengel, M.; Mosello, B.; Robinson, A.; Schleussner, C.F.; Serdeczny, O.; Stagl, J. Climate change impacts in Central Asia and their implications for development. *Reg. Environ. Change* **2017**, *17*, 1639-1650. <https://doi.org/10.1007/s10113-015-0893-z>.
- Sherpa, A.M.; Koottatep, T.; Zurbrügg, C.; Cissé, G. Vulnerability and adaptability of sanitation systems to climate change. *J. Water Clim. Change* **2014a**, *5*, 487-495. <https://doi.org/10.2166/wcc.2014.003>.
- Smadja, J.; Aubriot, O.; Puschiasis, O.; Duplan, T.; Grimaldi, J.; Hugonnet, M.; Buchheit, P. Climate change and water resources in the Himalayas. *Rev. Geogr. Alp.* **2015**, 103-2. <https://doi.org/10.4000/rga.2910>.
- Vergara, W.; Deeb, A.; Valencia, A.; Bradley, R.; Francou, B.; Zarzar, A.; Grünwaldt, A.; Haeussling, S. Economic impacts of rapid glacier retreat in the Andes. *Eos Trans. Am. Geophys. Union* **2007**, *88*, 261-264. <https://doi.org/10.1029/2007EO250001>.
- Viviroli, D.; Kumm, M.; Meybeck, M.; Kallio, M.; Wada, Y. Increasing dependence of lowland populations on mountain water resources. *Nat. Sustain.* **2020**, *3*, 917-928. <https://doi.org/10.1038/s41893-020-0559-9>.
- Vuille M.; Carey, M.; Huggel, C.; Buytaert, W.; Rabatel, A.; Jacobsen, D.; Soruco, A.; Villacis, M.; Yarleque, C.; Timm, O.E.; Condom, T.; Salzmann, N.; Sicart, J.E. Rapid decline of snow and ice in the tropical Andes-impacts, uncertainties and challenges ahead. *Earth-Sci. Rev.* **2018**, *176*, 195-213. <https://doi.org/10.1016/j.earscirev.2017.09.019>.
- Wang, S.; He, Y.; Song, X. Impacts of climate warming on alpine glacier tourism and adaptive measures: A case study of baishui glacier No.1 in yulong snow mountain, Southwestern China. *J. Earth Sci.* **2010**, *21*, 166-178. <https://doi.org/10.1007/s12583-010-0015-2>.
- Yang, Y.; Hopping, K.A.; Wang, G.; Chen, J.; Peng, A.; Klein, J.A. Permafrost and drought regulate vulnerability of Tibetan Plateau grasslands to warming. *Ecosphere* **2018**, *9*, e02233. <https://doi.org/10.1002/ecs2.2233>.
- Yershov, E.D. *General Geocryology*. Cambridge University Press, Cambridge. 1998.
- Young, E.F.; Tysklind, N.; Meredith, M.P.; Bruyn, M.D.; Belchier, M.; Murphy, E. J.; Carvalho, G.R. Stepping stones to isolation: Impacts of a changing climate on the connectivity of fragmented fish populations. *Evol. Appl.* **2018**, *11*, 978-994. <https://doi.org/10.1111/eva.12613>.

## **Goal 2. End hunger, achieve food security and improved nutrition and promote sustainable agriculture**

- Barnett, T.; Adam, J.C.; Lettenmaier, D.P. Potential impacts of a warming climate on water availability in snow-dominated regions. *Nature* **2005**, *438*, 303-309. <https://doi.org/10.1038/nature04141>.
- Barrett, K.; Bosak, K. The role of place in adapting to climate change: A case study from Ladakh, Western Himalayas. *Sustainability* **2018**, *10*, 898. <https://doi.org/10.3390/su10040898>.
- Bury, J.T.; Mark, B.G.; McKenzie, J.M.; French, A.; Baraer, M.; Huh, K.I.; Luyo, M.A.Z.; López, R.J.G. Glacier recession and human vulnerability in the Yanamarey watershed of the Cordillera Blanca, Peru. *Climatic Change* **2011**, *105*, 179-206. <https://doi.org/10.1007/s10584-010-9870-1>.
- Chin, H.F. Seedbanks: Conserving the past for the future. *Seed Sci. Technol.* **1994**, *22*, 385-400.
- Food and Agriculture Organization of the United Nations (FAO). Impacts of climate change on fisheries and aquaculture: synthesis of current knowledge, adaptation and mitigation options. 2018.
- Fuhrer, J.; Smith, P.; Gobiet, A. Implications of climate change scenarios for agriculture in alpine regions - A case study in the Swiss Rhone catchment. *Sci. Total Environ.* **2014**, *493*, 1232-1241. <https://doi.org/10.1016/j.scitotenv.2013.06.038>.
- Gentle, P.; Maraseni, T.N. Climate change, poverty and livelihoods: adaptation practices by rural mountain communities in Nepal. *Environ. Sci. Policy* **2012**, *21*, 24-34. <https://doi.org/10.1016/j.envsci.2012.03.007>.
- Hussain, A.; Rasul, G.; Mahapatra, B.; Wahid, S.; Tuladhar, S. Climate change-induced hazards and local adaptations in agriculture: A study from Koshi River Basin, Nepal. *Nat. Hazards* **2018**, *91*, 1-19. <https://doi.org/10.1007/s11069-018-3187-1>.
- Ingty, T. High mountain communities and climate change: adaptation, traditional ecological knowledge, and institutions. *Climatic Change* **2017**, *145*, 41-55. <https://doi.org/10.1007/s10584-017-2080-3>.
- Johnston, G.H. Permafrost-engineering design and construction. *Cold Reg. Sci. Technol.* **1982**, *6*, 179-179. [https://doi.org/10.1016/0013-7952\(83\)90037-6](https://doi.org/10.1016/0013-7952(83)90037-6).
- Mukherji, A.; Sinisalo, A.; Nüsser, M. Contributions of the cryosphere to mountain communities in the Hindu Kush Himalaya: A review. *Reg. Environ. Change* **2019**, *19*, 1311-1326. <https://doi.org/10.1007/s10113-019-01484-w>.
- Myers, S.S.; Smith, M.R.; Guth, S.; Golden, C.D.; Vaitla, B.; Mueller, N.D.; Dangour, A.D.; Huybers, P. Climate change and global food systems: potential impacts on food security and undernutrition. *Annu. Rev. Publ. Health* **2017**, *38*, 259-277. <https://doi.org/10.1146/annurev-publhealth-031816-044356>.
- Najafi, E.; Pal, I.; Khanbilvardi, R. Climate drives variability and joint variability of global crop yields. *Sci. Total Environ.* **2019**, *662*, 361-372. <https://doi.org/10.1016/j.scitotenv.2019.01.172>.
- Nüsser, M.; Dame, J.; Parveen, S.; Kraus, B.; Baghel, R.; Schmidt, S. Cryosphere-fed irrigation networks in the Northwestern Himalaya: Precarious livelihoods and adaptation strategies under the impact of climate change. *Mt. Res. Dev.* **2019**, *39*,



- 1-11. <https://doi.org/10.1659/MRD-JOURNAL-D-18-00072.1>.
- Nüsser, M.; Baghel, R. Local knowledge and global concerns: Artificial glaciers as a focus of environmental knowledge and development interventions. In: Ethnic and cultural dimensions of knowledge. Springer, Cham. 2016. [https://doi.org/10.1007/978-3-319-21900-4\\_9](https://doi.org/10.1007/978-3-319-21900-4_9).
- Nuesser, M.; Schmidt, S. Nanga parbat revisited: Evolution and dynamics of sociohydrological interactions in the Northwestern Himalaya. *Ann. Am. Assoc. Geogr.* 2017, 107, 403-415. <https://doi.org/10.1080/24694452.2016.1235495>.
- Nuesser, M.; Dame, J.; Kraus, B.; Baghel, R.; Schmidt, S. Socio-hydrology of “artificial glaciers” in Ladakh, India: Assessing adaptive strategies in a changing cryosphere. *Reg. Environ. Change* 2019, 19, 1327-1337. <https://doi.org/10.1007/s10113-018-1372-0>.
- Obersteiner, M.; Walsh, B.; Frank, S.; Havlík, P.; Cantele, M.; Liu, J.; Palazzo, A.; Herrero, M.; Lu, Y.; Mosnier, A.; Valin, H.; Riahi, K.; Kraxner, F.; Fritz, S.; Vuuren, D.V. Assessing the land resource-food price nexus of the sustainable development goals. *Sci. Adv.* 2016, 2, e1501499. <https://doi.org/10.1126/sciadv.1501499>.
- Pritchard, H.D. Asia’s shrinking glaciers protect large populations from drought stress. *Nature* 2019, 569, 649-654. <https://doi.org/10.1038/s41586-019-1240-1>.
- Qin, Y.; Abatzoglou, J.T.; Siebert, S.; Huning, L.S.; AghaKouchak, A.; Mankin, J.S.; Hong, C.; Tong, D.; Davis, S.J.; Mueller, N.D. Agricultural risks from changing snowmelt. *Nat. Clim. Change* 2020, 10, 459-465. <https://doi.org/10.1038/s41558-020-0746-8>.
- Rasul, G.; Molden, D. The global social and economic consequences of mountain cryospheric change. *Front. Environ. Sci.* 2019, 7, 91. <https://doi.org/10.3389/fenvs.2019.00091>.
- Smadja, J.; Aubriot, O.; Puschiasis, O.; Duplan, T.; Grimaldi, J.; Hugonnet, M.; Buchheit, P. Climate change and water resources in the Himalayas. *Rev. Geogr. Alp.* 2015, 103-2. <https://doi.org/10.4000/rga.2910>.
- Turunen, M.; Rasmus, S.; Bavay, M.; Ruosteenoja, K.; Heiskanen, J. Coping with difficult weather and snow conditions: Reindeer herders’ views on climate change impacts and coping strategies. *Clim. Risk Manag.* 2016, 11, 15-36. <https://doi.org/10.1016/j.crm.2016.01.002>.
- Viviroli, D.; Kumm, M.; Meybeck, M.; Kallio, M.; Wada, Y. Increasing dependence of lowland populations on mountain water resources. *Nat. Sustain.* 2020, 3, 917-928. <https://doi.org/10.1038/s41893-020-0559-9>.
- Yershov, E.D. General geocryology. Cambridge University Press, Cambridge. 1998.

### **Goal 3. Ensure healthy lives and promote well-being for all at all ages**

- Butt, C.M.; Berger, U.; Bossi, R.; Tomy, G.T. Levels and trends of poly- and perfluorinated compounds in the arctic environment. *Sci. Total Environ.* 2010, 408, 2936-2965. <https://doi.org/10.1016/j.scitotenv.2010.03.015>.
- Colombo, N.; Salerno, F.; Gruber, S.; Freppaz, M.; Williams, M.; Fratianni, S.; Giardino, M. Review: Impacts of permafrost degradation on inorganic chemistry of surface fresh water. *Glob. Planet. Change* 2017, 162, 69-83. <https://doi.org/10.1016/j.gloplacha.2017.11.017>.

- Duvillard, P.A.; Ravel, L.; Marcer, M.; Schoeneich, P. Recent evolution of damage to infrastructure on permafrost in the French Alps. *Reg. Environ. Change* **2019**, *19*, 1281-1293. <https://doi.org/10.1007/s10113-019-01465-z>.
- Estallo, E.L.; Ludueña-Almeida, F.F.; Introini, M.V.; Zaidenberg, M.; Almirón, W.R. Weather variability associated with *Aedes (Stegomyia) aegypti* (Dengue Vector) oviposition dynamics in Northwestern Argentina. *PLoS One* **2015**, *10*, e0127820. <https://doi.org/10.1371/journal.pone.0127820>.
- Fuhrer, J.; Smith, P.; Gobiet, A. Implications of climate change scenarios for agriculture in alpine regions- A case study in the Swiss Rhone catchment. *Sci. Total Environ.* **2014**, *493*, 1232-1241. <https://doi.org/10.1016/j.scitotenv.2013.06.038>.
- Glotov, V.E.; Chlachula, J.; Glotova, L. P.; Little, E. Causes and environmental impact of the gold-tailings dam failure at Karamken, the Russian Far East. *Eng. Geol.* **2018**, *245*, 236-247. <https://doi.org/10.1016/j.enggeo.2018.08.012>.
- Govaerts, J.; Beerten, K.; Veen, J.T. Weichselian permafrost depth in the Netherlands: A comprehensive uncertainty and sensitivity analysis. *Cryosphere* **2016**, *10*, 2907-2922. <https://doi.org/10.5194/tc-10-2907-2016>.
- Hodson, A. Understanding the dynamics of black carbon and associated contaminants in glacial systems. *Wiley Interdisciplinary Reviews: Water* **2014**, *1*, 141-149. <https://doi.org/10.1002/wat2.1016>.
- Hussain, A.; Rasul, G.; Mahapatra, B.; Wahid, S.; Tuladhar, S. Climate change-induced hazards and local adaptations in agriculture: A study from Koshi River Basin, Nepal. *Nat. Hazards* **2018**, *91*, 1-19. <https://doi.org/10.1007/s11069-018-3187-1>.
- Li, D.; Yap, K. Climate change and its impact on food and nutrition security and food safety in China. *World Rev. Nutr. Diet.* **2011**, *102*, 175-182. <https://doi.org/10.1159/000327807>.
- Milner, A.M.; Khamis, K.; Battin, T.J.; Brittain, J.E.; Barrand, N.E.; Füreder, L.; Cauvy-Fraunié, S.; Gíslason, G.M.; Jacobsen, D.; Hannah, D.M.; Hodson, A.J.; Hood, E.; Lencioni, V.; Ólafsson, J.S.; Robinson, C.T.; Tranter, M.; Brown, L.E.; Brown, L.E. Glacier shrinkage driving global changes in downstream systems. *P. Natl. Acad. Sci. USA* **2017**, *114*, 9770-9778. <https://doi.org/10.1073/pnas.1619807114>.
- Phillips, M.; Margreth, S. Effects of ground temperature and slope deformation on the service life of snow-supporting structures in mountain permafrost. *Proceedings of the 9th International Conference on Permafrost, Fairbanks, Alaska*. 1990.
- Rasmussen, B.M. Unsettling times: Living with the changing horizons of the Peruvian Andes. *Lat. Am. Perspect.* **2015**, *43*, 73-86. <https://doi.org/10.1177/0094582X16637867>.
- Rasul, G.; Pasakhala, B.; Mishra, A. Pant, S. Adaptation to mountain cryosphere change: issues and challenges. *Clim. Dev.* **2020**, *12*, 297-309. <https://doi.org/10.1080/17565529.2019.1617099>.
- Sherpa, A.M.; Koottatep, T.; Zurbrugg, C.; Cissé, G. Vulnerability and adaptability of sanitation systems to climate change. *J. Water Clim. Change* **2014**, *5*, 487-495. <https://doi.org/10.2166/wcc.2014.003>.
- Sherpa, P.Y. Climate change, perceptions, and social heterogeneity in pharak, mount everest region of Nepal. *Hum. Organ.* **2014**, *73*, 153-161.

<https://www.jstor.org/stable/44148749>.

Sondergaard, J.; Tamstorf, M.; Elberling, B.; Larsen, M.M.; Mylius, M.R.; Lund, M.; Abermann, J.; Rigét, F. Mercury exports from a High-Arctic river basin in Northeast Greenland (74°N) largely controlled by glacial lake outburst floods. *Sci. Total Environ.* **2015**, *514*, 83-91. <https://doi.org/10.1016/j.scitotenv.2015.01.097>.

#### **Goal 4. Ensure inclusive and equitable quality education and promote lifelong learning opportunities for all**

Brugger, J.; Dunbar, K.W.; Jurt, C.; Orlove, B. Climates of anxiety: Comparing experience of glacier retreat across three mountain regions. *Emot. Space. Soc.* **2013**, *6*, 4-13. <https://doi.org/10.1016/j.emospa.2012.05.001>.

Gagne, K.; Rasmussen, M.B.; Orlove, B. Glaciers and society: Attributions, perceptions, and valuations. *Wires. Clim. Change* **2014**, *5*, 793-808. <https://doi.org/10.1002/wcc.315>.

IPCC. Special report on the ocean and cryosphere in a changing climate (SROCC). IPCC Intergovernmental Panel on Climate Change: Geneva, Switzerland, 2019.

IPCC. Special report on global warming of 1.5°C. Cambridge University Press, Cambridge, 2018.

Kara, F.; Yucel, I. Climate change effects on extreme flows of water supply area in Istanbul: Utility of regional climate models and downscaling method. *Environ. Monit. Assess.* **2015**, *187*, 580-580. <https://doi.org/10.1007/s10661-015-4808-8>.

Sherpa, A.M.; Koottatep, T.; Zurbrugg, C.; Cissé, G. Vulnerability and adaptability of sanitation systems to climate change. *J. Water Clim. Change* **2014**, *5*, 487-495. <https://doi.org/10.2166/wcc.2014.003>.

Vincent, W.F.; Lemay, M.; Allard, M.; Wolfe, B.B. Adapting to permafrost change: A science framework. *Eos Trans. Am. Geophys. Union* **2013**, *94*, 373-375. <https://doi.org/10.1002/2013EO420002>.

#### **Goal 5. Achieve gender equality and empower all women and girls**

Dangi, M.B.; Chaudhary, R.P.; Rijal, K.; Stahl, P.D.; Belbase, S.; Gerow, K.G.; Fernandez, D.; Pyakurel, B. Impacts of environmental change on agroecosystems and livelihoods in annapurna conservation area, Nepal. *Environ. Dev.* **2017**, *25*, 59-72. <https://doi.org/10.1016/j.envdev.2017.10.001>.

Huss, M.; Bookhagen, B.; Huggel, C.; Jacobsen, D.; Bradley, R.S.; Clague, J.J.; Vuille, M.; Buytaert, W.; Cayan, D.R.; Greenwood, G.; Mark, B.G.; Milner, A.M.; Weingartner, R.; Winder, M. Toward mountains without permanent snow and ice. *Earth's Future* **2017**, *5*, 418-435. <https://doi.org/10.1002/2016EF000514>.

International Hydropower Association (IHA). Hydropower status report 2018. 2018.

International Hydropower Association (IHA). Advancing sustainable hydropower: Annual report 2020-2021. 2020.

Mcdowell, G.; Ford, J.D.; Lehner, B.; Berrang-Ford, L.; Sherpa, A. Climate-related hydrological change and human vulnerability in remote mountain regions: A case study from Khumbu, Nepal. *Reg. Environ. Change* **2013**, *13*, 299-310. <https://doi.org/10.1007/s10113-012-0333-2>.

- Scientific and Cultural Organisation United Nations Educational (UNESCO). Operational guidelines for the implementation of the world heritage convention. Paris, 2012.
- Verma, R.; Khadka, M. Gender experiences and responses to climate change in the Himalayas: ICIMOD's interactive panel at the women's world congress. Athmandu: International Centre for Integrated Mountain Development (ICIMOD). 2011.
- Vincent, W.F.; Lemay, M.; Allard, M.; Wolfe, B.B. Adapting to permafrost change: A science framework. *Eos Trans. Am. Geophys. Union* **2013**, *94*, 373-375. <https://doi.org/10.1002/2013EO420002>.

## **Goal 6. Ensure availability and sustainable management of water and sanitation for all**

- Allison, E.A. The spiritual significance of glaciers in an age of climate change. *Wires. Clim. Change* **2015**, *6*, 493-508. <https://doi.org/10.1002/wcc.354>.
- Archer, D.R.; Forsythe, N.; Fowler, H.J.; Shah, S.M. Sustainability of water resources management in the Indus basin under changing climatic and socio economic conditions. *Hydrol. Earth Syst. Sc.* **2010**, *14*, 1669-1680. <https://doi.org/10.5194/hess-14-1669-2010>.
- Barnett, T.; Adam, J.C.; Lettenmaier, D.P. Potential impacts of a warming climate on water availability in snow-dominated regions. *Nature* **2005**, *438*, 303-309. <https://doi.org/10.1038/nature04141>.
- Beniston, M.; Stoffel, M. Assessing the impacts of climatic change on mountain water resources. *Sci. Total Environ.* **2014**, *493*, 1129-1137. <https://doi.org/10.1016/j.scitotenv.2013.11.122>.
- Buytaert, W.; Bievre, B.D. Water for cities: The impact of climate change and demographic growth in the tropical Andes. *Water Resour. Res.* **2012**, *48*, 8503. <https://doi.org/10.1029/2011WR011755>.
- Comola, F.; Schaefli, B.; Rinaldo, A.; Lehning, M. Thermodynamics in the hydrologic response: Travel time formulation and application to Alpine catchments. *Water Resour. Res.* **2015**, *51*, 1671-1687. <https://doi.org/10.1002/2014WR016228>.
- Dangi, M.B.; Chaudhary, R.P.; Rijal, K.; Stahl, P.D.; Belbase, S.; Gerow, K.G.; Fernandez, D.; Pyakurel, B. Impacts of environmental change on agroecosystems and livelihoods in annapurna conservation area, Nepal. *Environ. Dev.* **2017**, *25*, 59-72. <https://doi.org/10.1016/j.envdev.2017.10.001>.
- Eby, L.A.; Helmy, O.; Holsinger, L.M.; Young, M.K. Evidence of climate-induced range contractions in bull trout *salvelinus confluentus* in a rocky mountain watershed, USA. *PLoS One* **2014**, *9*, e98812. <https://doi.org/10.1371/journal.pone.0098812>.
- Fell, S.C.; Carrivick, J.L.; Brown, L.E. The multitrophic effects of climate change and glacier retreat in mountain rivers. *Bioscience* **2017**, *67*, 897-911. <https://doi.org/10.1093/biosci/bix107>.
- Fell, S.; Carrivick, J.L.; Kelly, M.G.; Füreder, L.; Brown, L.E. Declining glacier cover threatens the biodiversity of alpine river diatom assemblages. *Glob. Chang. Biol.* **2018**, *24*, 5828-5840. <https://doi.org/10.1111/gcb.14454>.
- Garavaglia, V.; Diolaiuti, G.; Smiraglia, C.; Pasquale, V.; Pelfini, M. Evaluating tourist perception of environmental changes as a contribution to managing natural

- resources in glacierized areas: a case study of the Forni glacier (Stelvio National Park, Italian Alps). *Environ. Manage.* **2012**, *50*, 1125-1138. <https://doi.org/10.1007/s00267-012-9948-9>.
- Garavaglia, V.; Pelfini, M. Glacial geomorphosites and related landforms: A proposal for a dendrogeomorphological approach and educational trails. *Geoheritage* **2011**, *3*, 15-25. <https://doi.org/10.1007/s12371-010-0027-4>.
- Gaudard, L.; Romerio, F.; Dalla Valle, F.; Gorret, R.; Maran, S.; Ravazzani, G.; Stoffelf, M.; Volonterio, M. Climate change impacts on hydropower in the Swiss and Italian Alps. *Sci. Total Environ.* **2014**, *493*, 1211-1221. <https://doi.org/10.1016/j.scitotenv.2013.10.012>.
- Gentle, P.; Thwaites, R. Transhumant pastoralism in the context of socioeconomic and climate change in the mountains of Nepal. *Mt. Res. Dev.* **2016**, *36*, 173-182. <https://doi.org/10.1659/MRD-JOURNAL-D-15-00011.1>.
- Giacomelli, P.; Rossetti, A.; Brambilla, M. Adapting water allocation management to drought scenarios. *NAT Hazard. Earth Sys.* **2008**, *8*, 293-302. <https://doi.org/10.5194/nhess-8-293-2008>.
- Glotov, V.E.; Chlachula, J.; Glotova, L. P.; Little, E. Causes and environmental impact of the gold-tailings dam failure at Karamken, the Russian Far East. *Eng. Geol.* **2018**, *245*, 236-247. <https://doi.org/10.1016/j.enggeo.2018.08.012>.
- Govaerts, J.; Beerten, K.; Veen, J.T. Weichselian permafrost depth in the Netherlands: A comprehensive uncertainty and sensitivity analysis. *Cryosphere* **2016**, *10*, 2907-2922. <https://doi.org/10.5194/tc-10-2907-2016>.
- Hawkings, J.; Wadham, J.; Tranter, M.; Telling, J.; Bagshaw, E.; Beaton, A.; Simmons, S.L.; Chandler, D.; Tedstone, A.; Nienow, P. The Greenland ice sheet as a hot spot of phosphorus weathering and export in the Arctic. *Global Biogeochem. Cy.* **2016**, *30*, 191-210. <https://doi.org/10.1002/2015GB005237>.
- Hoegh-Guldberg, O.; Jacob, D.; Bindi, M. (Eds) Impacts of 1.5°C global warming on natural and human systems. *Global Warming of 1.5°C. An IPCC Special Report. IPCC Secretariat, In Press. 2018. 175-311.* <http://hdl.handle.net/10138/311749>.
- Huss, M.; Bookhagen, B.; Huggel, C.; Jacobsen, D.; Bradley, R.S.; Clague, J.J.; Vuille, M.; Buytaert, W.; Cayan, D.R.; Greenwood, G.; Mark, B.G.; Milner, A.M.; Weingartner, R.; Winder, M. Toward mountains without permanent snow and ice. *Earth's Future* **2017**, *5*, 418-435. <https://doi.org/10.1002/2016EF000514>.
- Hussain, A.; Rasul, G.; Mahapatra, B.; Wahid, S.; Tuladhar, S. Climate change-induced hazards and local adaptations in agriculture: A study from Koshi River Basin, Nepal. *Nat. Hazards* **2018**, *91*, 1-19. <https://doi.org/10.1007/s11069-018-3187-1>.
- Jamir, O. Understanding India-Pakistan water politics since the signing of the Indus water treaty. *Water Policy* **2016**, *18*, 1070-1087. <https://doi.org/10.2166/wp.2016.185>.
- Lawson, E.C.; Bhatia, M.P.; Wadham, J.L.; Kujawinski, E.B. Continuous summer export of nitrogen-rich organic matter from the Greenland ice sheet inferred by ultrahigh resolution mass spectrometry. *Environ. Sci. Technol.* **2014**, *48*, 14248-14257. <https://doi.org/10.1021/es501732h>.
- Matteodo, M.; Ammann, K.; Verrecchia, E.P.; Vittoz, P. Snowbeds are more affected than other subalpine-alpine plant communities by climate change in the Swiss Alps.



- Ecol. Evol. **2016**, 6, 6969-6982. <https://doi.org/10.1002/ece3.2354>.
- Milner, A.M.; Khamis, K.; Battin, T.J.; Brittain, J.E.; Barrand, N.E.; Füreder, L.; Cauvy-Fraunié, S.; Gíslason, G.M.; Jacobsen, D.; Hannah, D.M.; Hodson, A.J.; Hood, E.; Lencioni, V.; Ólafsson, J.S.; Robinson, C.T.; Tranter, M.; Brown, L.E.; Brown, L.E. Glacier shrinkage driving global changes in downstream systems. *P. Natl. Acad. Sci. USA*. **2017**, 114, 9770-9778. <https://doi.org/10.1073/pnas.1619807114>.
- Nuesser, M.; Dame, J.; Kraus, B.; Baghel, R.; Schmidt, S. Socio-hydrology of “artificial glaciers” in Ladakh, India: Assessing adaptive strategies in a changing cryosphere. *Reg. Environ. Change* **2019**, 19, 1327-1337. <https://doi.org/10.1007/s10113-018-1372-0>.
- Orlove, B.; Milch, K.; Zaval, L.; Ungemach, C.; Brugger, J.; Dunbar, K.; Jurt, C. Framing climate change in frontline communities: anthropological insights on how mountain dwellers in the USA, Peru, and Italy adapt to glacier retreat. *Reg. Environ. Change* **2019**, 19, 1295-1309. <https://doi.org/10.1007/s10113-019-01482-y>.
- Rasul, G.; Molden, D. The global social and economic consequences of mountain cryospheric change. *Front. Environ. Sci.* **2019**, 7, 91. <https://doi.org/10.3389/fenvs.2019.00091>.
- Rosvold, J. Perennial ice and snow-covered land as important ecosystems for birds and mammals. *J. Biogeogr.* **2016**, 43, 3-12. <https://doi.org/10.1111/jbi.12609>.
- Rui, D.H.; Song, B.; Ito, Y.; Wang, L. Study of polluted soil remediation based on freezing and thawing cycles. *Sciences in Cold and Arid Regions* **2014**, 6, 322-330. <https://doi.org/10.3724/SP.J.1226.2014.00322>.
- Schoen, E.R.; Wipfli, M.S.; Trammell, E.J.; Rinella, D.J.; Floyd, A.L.; Grunblatt, J.; McCarthy, M.D.; Meyer, B.E.; Morton, J.M.; Powell, J.E.; Prakash, A.; Reimer, M.N.; Stuefer, S.L.; Toniolo, H.; Wells, B.M.; Witmer, F.D. Future of Pacific Salmon in the face of environmental change: Lessons from one of the world's remaining productive Salmon regions. *Fisheries* **2017**, 42, 538-553. <https://doi.org/10.1080/03632415.2017.1374251>.
- Vuille M.; Carey, M.; Huggel, C.; Buytaert, W.; Rabatel, A.; Jacobsen, D.; Soruco, A.; Villacis, M.; Yarleque, C.; Timm, O.E.; Condom, T.; Salzmann, N.; Sicart, J.E. Rapid decline of snow and ice in the tropical Andes-impacts, uncertainties and challenges ahead. *Earth-Sci. Rev.* **2018**, 176, 195-213. <https://doi.org/10.1016/j.earscirev.2017.09.019>.
- Xenarios, S.; Gafurov, A.; Schmidt-Vogt, D.; Sehring, J.; Manandhar, S.; Hergarten, C.; Shigaeva, J.; Foggin, M. Climate change and adaptation of mountain societies in Central Asia: Uncertainties, knowledge gaps, and data constraints. *Reg. Environ. Change* **2019**, 19, 1339-1352. <https://doi.org/10.1007/s10113-018-1384-9>.
- Yang, Y.; Brown, C.; Yu, W.; Wescoat Jr, J.; Ringler, C. Water governance and adaptation to climate change in the Indus River Basin. *J. Hydrol.* **2014**, 519, 2527-2537. <https://doi.org/10.1016/j.jhydrol.2014.08.055>.
- Zaharescu, D.G.; Hooda, P.S.; Burghilea, C.I.; Polyakov, V.; Palanca-Soler, A. Climate change enhances the mobilisation of naturally occurring metals in high altitude environments. *Sci. Total Environ.* **2016**, 560, 73-81. <https://doi.org/10.1016/j.scitotenv.2016.04.002>.
- Zhang, Y.; Lu, Y.; Zhou, Q.; Wu, F. Optimal water allocation scheme based on trade-offs

between economic and ecological water demands in the Heihe River Basin of Northwest China. *Sci. Total Environ.* **2020**, *703*, 134958. <https://doi.org/10.1016/j.scitotenv.2019.134958>.

#### **Goal 7. Ensure access to affordable, reliable, sustainable and modern energy for all**

- Braun, M.; Fournier, E. Adaptation case studies in the energy sector-overcoming barriers to adaptation, report presented to climate change impacts and adaptation division. Nat. Resour. Canada. 2016.
- Chen, D.F.; Wand, M.C.; Xia, B. Formation condition and distribution prediction of gas hydrate in Qinghai-Tibet Plateau permafrost. *Chinese J. Geophys.* **2005**, *48*, 179-187. <https://doi.org/10.1002/cjg2.638>.
- Farinotti, D.; Round, V.; Huss, M.; Compagno, L.; Zekollari, H. Large hydropower and water-storage potential in future glacier-free basins. *Nature* **2019**, *575*, 341-344. <https://doi.org/10.1038/s41586-019-1740-z>.
- Hamududu, B.H.; Killingtveit, A. Assessing climate change impacts on global hydropower. *Energies* **2012**, *5*, 305-322. <https://doi.org/10.3390/en5020305>.
- International Renewable Energy Agency (IRENA). Installed renewable energy capacity, 2018.
- International Hydropower Association (IHA). Hydropower status report 2018. 2018.
- International Hydropower Association (IHA). Advancing sustainable hydropower: Annual report 2020-2021. 2020.
- Mcdowell, G.; Ford, J.D.; Lehner, B.; Berrang-Ford, L.; Sherpa, A. Climate-related hydrological change and human vulnerability in remote mountain regions: A case study from Khumbu, Nepal. *Reg. Environ. Change* **2013**, *13*, 299-310. <https://doi.org/10.1007/s10113-012-0333-2>.
- Karki, P. South Asia investment decision making in hydropower: decision tree case study of the upper arun hydropower project and koshi basin hydropower development in Nepal. World Bank. 2015.
- Schwanghart, W.; Worni, R.; Huggel, C.; Stoffel, M.; Korup, O. Uncertainty in the Himalayan energy-water nexus: Estimating regional exposure to glacial lake outburst floods. *Environ. Res. Lett.* **2016**, *11*, 074005. <https://doi.org/10.5167/uzh-130413>.
- Terrier, S.; Bieri, M.; Jordan, F.; Schleiss, A.J. Impact du retrait glaciaire et adaptation du potentiel hydroelectrique dans les Alpes suisses. *La Houille Blanche* **2015**, *1*, 93-101. <https://doi.org/10.1051/lhb/2015012>.

#### **Goal 8. Promote sustained, inclusive and sustainable economic growth, full and productive employment and decent work for all**

- Beaudin, L.; Huang, J. Weather conditions and outdoor recreation: A study of New England ski areas. *Ecol. Econ.* **2014**, *106*, 56-68. <https://doi.org/10.1016/j.ecolecon.2014.07.011>.
- Becken, S.; Lama, A.K.; Espiner, S. The cultural context of climate change impacts: Perceptions among community members in the Annapurna Conservation Area,

- Nepal. *Environ. Dev.* **2013**, *8*, 22-37. <https://doi.org/10.1016/j.envdev.2013.05.007>.
- Blair, L. Factoring climate change into recreation investment decisions: Evidence from Hatcher Pass, Alaska. *Symposium of University Research and Creative Expression (SOURCE)* **2015**, 94.
- Bokhorst, S.; Pedersen, S.H.; Brucker, L.; Anisimov, O.; Bjerke, J.W.; Brown, R.D.; Ehrich, D.; Essery, R.; Heilig, A.; Ingvander, S.; Johansson, C.; Johansson, M.; Jónsdóttir, I.S.; Inga, N.; Luoju, K.; Macelloni, G.; Mariash, H.; McLennan, D.; Rosqvist, G.N.; Sato, A.; Savela, H.; Schneebeli, M.; Sokolov, A.; Sokratov, S.A.; Terzago, S.; Schuler, D.V.; Williamson, S.; Qiu, Y.; Callaghan, T.V. Changing Arctic snow cover: A review of recent developments and assessment of future needs for observations, modelling, and impacts. *AMBIO: A Journal of the Human Environment* **2016**, *45*, 516-537. <https://doi.org/10.1007/s13280-016-0770-0>.
- Cuerrier, A.; Brunet, N.D.; Gérin-Lajoie, J.; Downing, A.; Lévesque, E. The study of inuit knowledge of climate change in Nunavik, Quebec: A mixed methods approach. *Hum. Ecol.* **2015**, *43*, 379-394. <https://doi.org/10.1007/s10745-015-9750-4>.
- Gaudard, L.; Gabbi, J.; Bauder, A.; Romerio, F. Long-term uncertainty of hydropower revenue due to climate change and electricity prices. *Water Resour. Manag.* **2016**, *30*, 1325-1343. <https://doi.org/10.1007/s11269-015-1216-3>.
- Grunewald, T.; Wolfsperger, F.; Lehning, M. Snow farming: conserving snow over the summer season. *Cryosphere* **2015**, *12*, 385-400. <https://doi.org/10.5194/tc-12-385-2018>.
- Hamududu, B.H.; Killingtveit, A. Assessing climate change impacts on global hydropower. *Energies* **2012**, *5*, 305-322. <https://doi.org/10.3390/en5020305>.
- Higgins, P. Outdoor recreation, outdoor education and the economy of Scotland. *Horizons* **2000**, *7*, 24-29.
- Mukherji, A.; Sinisalo, A.; Nüsser, M. Contributions of the cryosphere to mountain communities in the Hindu Kush Himalaya: A review. *Reg. Environ. Change* **2019**, *19*, 1311-1326. <https://doi.org/10.1007/s10113-019-01484-w>.
- International Hydropower Association (IHA). Hydropower status report 2018. 2018.
- International Hydropower Association (IHA). Advancing sustainable hydropower: Annual report 2020-2021. 2020.
- Johnston, G.H. Permafrost, engineering design and construction. *Eng. Geol.* **1983**, *19*, 153.
- Konchar, K.M.; Staver, B.; Salick, J.; Chapagain, A.; Joshi, L.; Karki, S.; Lo, S.; Paudel, A.; Subedi, P.; Ghimire, S.K. Adapting in the shadow of annapurna: A climate tipping point. *J. Ethnobiol.* **2015**, *35*, 449-471. <https://doi.org/10.2993/0278-0771-35.3.449>.
- Milner, A.M.; Khamis, K.; Battin, T.J.; Brittain, J.E.; Barrand, N.E.; Füreder, L.; Cauvy-Fraunié, S.; Gíslason, G.M.; Jacobsen, D.; Hannah, D.M.; Hodson, A.J.; Hood, E.; Lencioni, V.; Ólafsson, J.S.; Robinson, C.T.; Tranter, M.; Brown, L.E.; Brown, L.E. Glacier shrinkage driving global changes in downstream systems. *P. Natl. Acad. Sci. USA.* **2017**, *114*, 9770-9778. <https://doi.org/10.1073/pnas.1619807114>.
- Nuesser, M.; Dame, J.; Kraus, B.; Baghel, R.; Schmidt, S. Socio-hydrology of “artificial glaciers” in Ladakh, India: Assessing adaptive strategies in a changing cryosphere. *Reg. Environ. Change* **2019**, *19*, 1327-1337. <https://doi.org/10.1007/s10113-018-1372-0>.



- Orlove, B.; Milch, K.; Zaval, L.; Ungemach, C.; Brugger, J.; Dunbar, K.; Jurt, C. Framing climate change in frontline communities: anthropological insights on how mountain dwellers in the USA, Peru, and Italy adapt to glacier retreat. *Reg. Environ. Change* **2019**, *19*, 1295-1309. <https://doi.org/10.1007/s10113-019-01482-y>.
- Paden, R.; Harmon, L.K.; Milling, C.R. Philosophical histories of the aesthetics of nature. *Environ. Ethics* **2013**, *35*, 57-77. <https://doi.org/10.5840/enviroethics20133516>.
- Prowse, T.D.; Furgal, C.; Chouinard, R.; Melling, H.; Milburn, D.; Smith, S.L. Implications of climate change for economic development in Northern Canada: Energy, resource, and transportation sectors. *AMBIO: A Journal of the Human Environment* **2009**, *38*, 272-281. <https://doi.org/10.1579/0044-7447-38.5.272>.
- Rasul, G.; Molden, D. The global social and economic consequences of mountain cryospheric change. *Front. Environ. Sci.* **2019**, *7*, 91. <https://doi.org/10.3389/fenvs.2019.00091>.
- Council Arctic. Arctic biodiversity assessment, status and trends in Arctic biodiversity. Akureyri: Conservation of Arctic Flora and Fauna (CAFF). 2013.
- Schoen, E.R.; Wipfli, M.S.; Trammell, E.J.; Rinella, D.J.; Floyd, A.L.; Grunblatt, J.; McCarthy, M.D.; Meyer, B.E.; Morton, J.M.; Powell, J.E.; Prakash, A.; Reimer, M.N.; Stuefer, S.L.; Toniolo, H.; Wells, B.M.; Witmer, F.D. Future of Pacific Salmon in the face of environmental change: Lessons from one of the world's remaining productive Salmon regions. *Fisheries* **2017**, *42*, 538-553. <https://doi.org/10.1080/03632415.2017.1374251>.
- Scott, D.; Steiger, R.; Dannevig, H.; Aall, C. Climate change and the future of the Norwegian alpine ski industry. *Curr. Issues Tour.* **2019**, *23*, 2396-2409. <https://doi.org/10.1080/13683500.2019.1608919>.
- Sherpa, A.M.; Koottatep, T.; Zurbrügg, C.; Cissé, G. Vulnerability and adaptability of sanitation systems to climate change. *J. Water Clim. Change* **2014**, *5*, 487-495. <https://doi.org/10.2166/wcc.2014.003>.
- Sherpa, P.Y. Climate change, perceptions, and social heterogeneity in pharak, mount everest region of Nepal. *Hum. Organ.* **2014**, *73*, 153-161. <https://www.jstor.org/stable/44148749>.
- Spandre, P.; François, H.; Verfaillie, D.; Pons, M.; Vernay, M.; Lafaysse, M.; George, E.; Morin, S. Winter tourism under climate change in the Pyrenees and the French Alps: Relevance of snowmaking as a technical adaptation. *Cryosphere* **2019**, *13*, 1325-1347. <https://doi.org/10.5194/tc-13-1325-2019>.
- Spandre, P.; François, H.; Verfaillie, D.; Lafaysse, M.; Déqué, M.; Eckert, N.; George, E.; Morin, S. Climate controls on snow reliability in French Alps ski resorts. *Sci. Rep.* **2019**, *9*, 8043. <https://doi.org/10.1038/s41598-019-44068-8>.
- Steiger, R.; Scott, D.; Abegg, B.; Pons, M.; Aall, C. A critical review of climate change risk for ski tourism. *Curr. Issues Tour.* **2019**, *22*, 1343-1379. <https://doi.org/10.1080/13683500.2017.1410110>.
- Sturm, M.; Goldstein, M.A.; Parr, C. Water and life from snow: A trillion dollar science question. *Water Resour. Res.* **2017**, *53*, 3534-3544. <https://doi.org/10.1002/2017WR020840>.
- Vanat, L. International report on snow & mountain tourism - overview of the key industry

- figures for ski resorts. Geneva, Switzerland. 2018.
- Vanat, L. International report on snow & mountain tourism - overview of the key industry figures for ski resorts. Geneva, Switzerland. 2020.
- Vergara, W.; Deeb, A.; Valencia, A.; Bradley, R.; Francou, B.; Zarzar, A.; Grünwaldt, A.; Haeussling, S. Economic impacts of rapid glacier retreat in the Andes. *Eos Trans. Am. Geophys. Union* **2007**, *88*, 261-264. <https://doi.org/10.1029/2007EO250001>.
- Wang, S.; He, Y.; Song, X. Impacts of climate warming on alpine glacier tourism and adaptive measures: A case study of baishui glacier No.1 in yulong snow mountain, Southwestern China. *J. Earth Sci.* **2010**, *21*, 166-178. <https://doi.org/10.1007/s12583-010-0015-2>.
- Yershov, E.D. General geocryology. Cambridge University Press, Cambridge. 1998.

## **Goal 9. Build resilient infrastructure, promote inclusive and sustainable industrialization and foster innovation**

- Auld, H.; MacIver, D.; Klaassenet, J. Adaptation options for infrastructure under changing climate conditions. In Proceedings of the 2006 Institute of Electrical and Electronics Engineers (IEEE) Engineering Institute of Canada (EIC) Climate Change Conference, Ottawa, Canada. 2006.
- Bommer, C.; Phillips, M.; Arenson, L.U. Practical recommendations for planning, constructing and maintaining infrastructure in mountain permafrost. *Permafrost Periglac.* **2010**, *21*, 97-104. <https://doi.org/10.1002/ppp.679>.
- Chai, M.; Mu, Y.; Zhang, J.; Ma, W.; Liu, G.; Chen, J. Characteristics of asphalt pavement damage in degrading permafrost regions: Case study of the Qinghai-Tibet highway, China. *J. Cold Reg. Eng.* **2018**, *32*, 05018003. [https://doi.org/10.1061/\(ASCE\)CR.1943-5495.0000165](https://doi.org/10.1061/(ASCE)CR.1943-5495.0000165).
- Cheng, G. A roadbed cooling approach for the construction of Qinghai-Tibet railway. *Cold Reg. Sci. Technol.* **2005a**, *42*, 169-176. <https://doi.org/10.1016/j.coldregions.2005.01.002>.
- Cheng, G. Permafrost studies in the Qinghai-Taibei plateau for road construction. *J. Cold Reg. Eng.* **2005b**, *19*, 19-29. [https://doi.org/10.1061/\(ASCE\)0887-381X\(2005\)19:1\(19\)](https://doi.org/10.1061/(ASCE)0887-381X(2005)19:1(19)).
- Dore, G., Niu, F., Brooks, H. Adaptation methods for transportation infrastructure built on degrading permafrost. *Permafrost Periglac.* **2016**, *27*, 352-364. <https://doi.org/10.1002/ppp.1919>.
- Gardner, J.S.; Dekens, J. Mountain hazards and the resilience of social-ecological systems: lessons learned in India and Canada. *Nat. Hazards* **2007**, *41*, 317-336. <https://doi.org/10.1007/s11069-006-9038-5>.
- Guo, D.; Wang, H. CMIP5 permafrost degradation projection: A comparison among different regions. *J. Geophys. Res.* **2016**, *121*, 4499-4517. <https://doi.org/10.1002/2015JD024108>.
- Lai, Y.; Xu, X.; Dong, Y.; Li, S. Present situation and prospect of mechanical research on frozen soils in China. *Cold Reg. Sci. Technol.* **2013**, *87*, 6-18. <https://doi.org/10.1016/j.coldregions.2012.12.001>.
- Ma, W.; Cheng, G.; Wu, Q. Construction on permafrost foundations: Lessons learned from the Qinghai-Tibet railroad. *Cold Reg. Sci. Technol.* **2009**, *59*, 3-11.

<https://doi.org/10.1016/j.coldregions.2009.07.007>.

- Shi, G.Q.; Zhang, Y.Z.; Zhao, S.Y.; Zhang, L.X.; Sun, B. Analysis of high-speed railway roadbed settlement in seasonally frozen regions. International Conference on Civil, Architectural and Hydraulic Engineering (ICCAHE). Trans Tech Publications Ltd. 2012. <https://doi.org/10.4028/www.scientific.net/AMM.204-208.1740>.
- Xu, G.; Qi, J.; Jin, H. Model test study on influence of freezing and thawing on the crude oil pipeline in cold regions. Cold Reg. Sci. Technol. **2010**, *64*, 262-270. <https://doi.org/10.1016/j.coldregions.2010.04.010>.
- Yu, W.; Han, F.; Liu, W.; Harris, S.A. Geohazards and thermal regime analysis of oil pipeline along the Qinghai-Tibet plateau engineering corridor. Nat. Hazards **2016**, *83*, 193-209. <https://doi.org/10.1007/s11069-016-2308-y>.
- Wang, S.; Niu, F.; Chen, J.; Dong, Y. Permafrost research in china related to express highway construction. Permafrost Periglac. **2020**, *31*, 406-416. <https://doi.org/10.1002/ppp.2053>.

## **Goal 10. Reduce inequality within and among countries**

- Barnett, T.; Adam, J.C.; Lettenmaier, D.P. Potential impacts of a warming climate on water availability in snow-dominated regions. Nature **2005**, *438*, 303-309. <https://doi.org/10.1038/nature04141>.
- Blair, L. Factoring climate change into recreation investment decisions: evidence from Hatcher Pass, Alaska. Symposium of University Research and Creative Expression (SOURCE) **2015**, 94.
- Burgess, A.S. Permafrost engineering design and construction. Can. J. Civil Eng. **1981**, *8*, 406-407. <https://doi.org/10.1139/l81-053>.
- Conservation of Arctic Flora and Fauna (CAFF). Actions for Arctic biodiversity 2013-2021. Implementing the recommendations of the Arctic biodiversity assessment. Akureyri, Iceland, 2015.
- Denning, A. From sublime landscapes to "white gold": How skiing transformed the alps after 1930. Environ. Hist. **2014**, *19*, 78-108. <https://doi.org/10.1093/envhis/emt105>.
- Duvillard, P.A.; Ravel, L.; Marcer, M.; Schoeneich, P. Recent evolution of damage to infrastructure on permafrost in the French Alps. Reg. Environ. Change **2019**, *19*, 1281-1293. <https://doi.org/10.1007/s10113-019-01465-z>.
- Food and Agriculture Organization of the United Nations (FAO). Impacts of climate change on fisheries and aquaculture: synthesis of current knowledge, adaptation and mitigation options. 2018.
- Gaudard, L.; Gabbi, J.; Bauder, A.; Romerio, F. Long-term uncertainty of hydropower revenue due to climate change and electricity prices. Water Resour. Manag. **2016**, *30*, 1325-1343. <https://doi.org/10.1007/s11269-015-1216-3>.
- Gentle, P.; Thwaites, R. Transhumant pastoralism in the context of socioeconomic and climate change in the mountains of Nepal. Mt. Res. Dev. **2016**, *36*, 173-182. <https://doi.org/10.1659/MRD-JOURNAL-D-15-00011.1>.
- Johnston, G.H. Permafrost, engineering design and construction. Eng. Geol. **1983**, *19*, 153.
- Ingty, T. High mountain communities and climate change: adaptation, traditional ecological knowledge, and institutions. Climatic Change **2017**, *145*, 41-55.

<https://doi.org/10.1007/s10584-017-2080-3>.

- IPCC. Special report on the ocean and cryosphere in a changing climate (SROCC). IPCC Intergovernmental Panel on Climate Change: Geneva, Switzerland. 2019.
- Merrey, D.J.; Hussain, A.; Tamang, D.D.; Thapa, B.; Prakash, A. Evolving high altitude livelihoods and climate change: A study from Rasuwa district, Nepal. *Food Secur.* **2018**, *10*, 1055-1071. <https://doi.org/10.1007/s12571-018-0827-y>.
- Mukherji, A.; Sinisalo, A.; Nüsser, M. Contributions of the cryosphere to mountain communities in the Hindu Kush Himalaya: A review. *Reg. Environ. Change* **2019**, *19*, 1311-1326. <https://doi.org/10.1007/s10113-019-01484-w>.
- Najafi, E.; Pal, I. Khanbilvardi, R. Climate drives variability and joint variability of global crop yields. *Sci. Total Environ.* **2019**, *662*, 361-372. <https://doi.org/10.1016/j.scitotenv.2019.01.172>.
- Nüsser, M.; Baghel, R. Local knowledge and global concerns: Artificial glaciers as a focus of environmental knowledge and development interventions. In: *Ethnic and cultural dimensions of knowledge*. Springer, Cham. **2016**. [https://doi.org/10.1007/978-3-319-21900-4\\_9](https://doi.org/10.1007/978-3-319-21900-4_9).
- Nyima, Y.; Hopping, K.A. Tibetan lake expansion from a pastoral perspective: Local observations and coping strategies for a changing environment. *Soc. Natur. Resour.* **2019**, *32*, 965-982. <https://doi.org/10.1080/08941920.2019.1590667>.
- Phillips, M.; Margreth, S. Effects of ground temperature and slope deformation on the service life of snow-supporting structures in mountain permafrost: Wisse Schijen, Randa, Swiss Alps. In: *Proceedings of the 9th International Conference on Permafrost*, Fairbanks, Alaska **1990**, 1417-1422.
- Prasain, S. Climate change adaptation measure on agricultural communities of Dhye in Upper Mustang, Nepal. *Climatic Change* **2018**, *148*, 279-291. <https://doi.org/10.1007/s10584-018-2187-1>.
- Rasul, G.; Molden, D. The global social and economic consequences of mountain cryospheric change. *Front. Environ. Sci.* **2019**, *7*, 91. <https://doi.org/10.3389/fenvs.2019.00091>.
- Sherpa, A.M.; Koottatep, T.; Zurbrügg, C.; Cissé, G. Vulnerability and adaptability of sanitation systems to climate change. *J. Water Clim. Change* **2014**, *5*, 487-495. <https://doi.org/10.2166/wcc.2014.003>.
- Sherpa, P.Y. Climate change, perceptions, and social heterogeneity in pharak, mount everest region of Nepal. *Hum. Organ.* **2014**, *73*, 153-161. <https://www.jstor.org/stable/44148749>.
- Vanat, L. International report on snow & mountain tourism - overview of the key industry figures for ski resorts. 2018.
- Vanat, L. International report on snow & mountain tourism - overview of the key industry figures for ski resorts. 2020.
- Vivioli, D.; Kummu, M.; Meybeck, M.; Kallio, M.; Wada, Y. Increasing dependence of lowland populations on mountain water resources. *Nat. Sustain.* **2020**, *3*, 917-928. <https://doi.org/10.1038/s41893-020-0559-9>.
- Wobus, C.; Small, E.E.; Hosterman, H.; Mills, D.; Stein, J.; Rissing, M.; Jones, R.; Duckworth, M.; Hall, R.; Kolian, M.; Creason, J.; Martinich, J. Projected climate change impacts

- on skiing and snowmobiling: A case study of the United States. *Global Environ. Chang.* **2017**, *45*, 1-14. <https://doi.org/10.1016/j.gloenvcha.2017.04.006>.
- Yang, X.T.; Qiu, X.P.; Fang, Y.P.; Xu, Y.; Zhu, F.B. Spatial variation of the relationship between transport accessibility and the level of economic development in Qinghai-Tibet Plateau, China. *J. Mt. Sci-Engl.* **2019**, *16*, 1883-1900. <https://doi.org/10.1007/s11629-018-5369-4>.

#### **Goal 11. Make cities and human settlements inclusive, safe, resilient and sustainable**

- Barnett, T.; Adam, J.C.; Lettenmaier, D.P. Potential impacts of a warming climate on water availability in snow-dominated regions. *Nature* **2005**, *438*, 303-309. <https://doi.org/10.1038/nature04141>.
- Bogdal, C.; Nikolic, D.; Luthi, M.P.; Schenker, U.; Scheringer, M.; Hungerbühler, K. Release of legacy pollutants from melting glaciers: Model evidence and conceptual understanding. *Environ. Sci. Technol.* **2010**, *44*, 4063-4069. <https://doi.org/10.1021/es903007h>.
- Bommer, C.; Phillips, M.; Arenson, L.U. Practical recommendations for planning, constructing and maintaining infrastructure in mountain permafrost. *Permafrost Periglac.* **2010**, *21*, 97-104. <https://doi.org/10.1002/ppp.679>.
- Bosson, J.B.; Huss, M.; Osipova, E. Disappearing world heritage glaciers as a keystone of nature conservation in a changing climate. *Earth's Future* **2019**, *7*, 469-479. <https://doi.org/10.1029/2018EF001139>.
- Buytaert, W.; Moulds, S.; Acosta, L.; De Bievre, B.; Olmos, C.; Villacis, M.; Tovar, C.; Verbist, K.M. Glacial melt content of water use in the tropical Andes. *Environ. Res. Lett.* **2017**, *12*, 114014. <https://doi.org/10.1088/1748-9326/aa926c>.
- Callanan, M. Managing frozen heritage: Some challenges and responses. *Quat. Int.* **2016**, *402*, 72-79. <https://doi.org/10.1016/j.quaint.2015.10.067>.
- Chai, M.; Mu, Y.; Zhang, J.; Ma, W.; Liu, G.; Chen, J. Characteristics of asphalt pavement damage in degrading permafrost regions: Case study of the Qinghai-Tibet highway, China. *J. Cold Reg. Eng.* **2018**, *32*, 05018003. [https://doi.org/10.1061/\(ASCE\)CR.1943-5495.0000165](https://doi.org/10.1061/(ASCE)CR.1943-5495.0000165).
- Cheng, G. A roadbed cooling approach for the construction of Qinghai-Tibet railway. *Cold Reg. Sci. Technol.* **2005a**, *42*, 169-176. <https://doi.org/10.1016/j.coldregions.2005.01.002>.
- Cheng, G. Permafrost studies in the Qinghai-Taibei plateau for road construction. *J. Cold Reg. Eng.* **2005b**, *19*, 19-29. [https://doi.org/10.1061/\(ASCE\)0887-381X\(2005\)19:1\(19\)](https://doi.org/10.1061/(ASCE)0887-381X(2005)19:1(19)).
- Dore, G.; Niu, F.; Brooks, H. Adaptation methods for transportation infrastructure built on degrading permafrost. *Permafrost Periglac.* **2016**, *27*, 352-364. <https://doi.org/10.1002/ppp.1919>.
- Drenkhan, F.; Huggel, C.; Guardamino, L.; Haeberli, W. Managing risks and future options from new lakes in the deglaciating Andes of Peru: The example of the Vilcanota-Urubamba basin. *Sci. Total Environ.* **2019**, *665*, 465-483. <https://doi.org/10.1016/j.scitotenv.2019.02.070>.
- Duvillard, P.A.; Ravel, L.; Marcer, M.; Schoeneich, P. Recent evolution of damage to infrastructure on permafrost in the French Alps. *Reg. Environ. Change* **2019**, *19*,



- 1281-1293. <https://doi.org/10.1007/s10113-019-01465-z>.
- Food and Agriculture Organization of the United Nations (FAO). Impacts of climate change on fisheries and aquaculture: synthesis of current knowledge, adaptation and mitigation options. 2018.
- Garavaglia, V.; Diolaiuti, G.; Smiraglia, C.; Pasquale, V.; Pelfini, M. Evaluating tourist perception of environmental changes as a contribution to managing natural resources in glacierized areas: a case study of the Forni glacier (Stelvio National Park, Italian Alps). *Environ. Manage.* **2012**, *50*, 1125-1138. <https://doi.org/10.1007/s00267-012-9948-9>.
- Garavaglia, V.; Pelfini, M. Glacial geomorphosites and related landforms: A proposal for a dendrogeomorphological approach and educational trails. *Geoheritage* **2011**, *3*, 15-25. <https://doi.org/10.1007/s12371-010-0027-4>.
- Gentle, P.; Thwaites, R. Transhumant pastoralism in the context of socioeconomic and climate change in the mountains of Nepal. *Mt. Res. Dev.* **2016**; *36*, 173-182. <https://doi.org/10.1659/MRD-JOURNAL-D-15-00011.1>.
- Hamududu, B.H.; Killingtveit, A. Assessing climate change impacts on global hydropower. *Energies* **2012**, *5*, 305-322. <https://doi.org/10.3390/en5020305>.
- Hill, A.F.; Minbaeva, C.K.; Wilson, A.M.; Satylkanov, R. Hydrologic controls and water vulnerabilities in the Naryn river basin, Kyrgyzstan: A socio-hydro case study of water stressors in central Asia. *Water* **2017**, *9*, 325. <https://doi.org/10.3390/w9050325>.
- Hodson, A. Understanding the dynamics of black carbon and associated contaminants in glacial systems. *Wiley Interdisciplinary Reviews: Water* **2014**, *1*, 141-149. <https://doi.org/10.1002/wat2.1016>.
- International Hydropower Association (IHA). Hydropower status report 2018. 2018.
- International Hydropower Association (IHA). Advancing sustainable hydropower: Annual report 2020-2021. 2020.
- Indian Himalayas Climate Adaptation Programme (IHCAP). Mountain and lowland linkages: A climate change perspective in the Himalayas. 2017.
- IPCC, Special report on the ocean and cryosphere in a changing climate (SROCC). IPCC Intergovernmental Panel on Climate Change: Geneva, Switzerland. 2019.
- Jurt, C.; Burga, M.D.; Vicuña, L.; Huggel, C.; Orlove, B. Local perceptions in climate change debates: insights from case studies in the Alps and the Andes. *Clim. Change* **2015**, *133*, 511-523. <https://doi.org/10.1007/s10584-015-1529-5>.
- Konchar, K.M.; Staver, B.; Salick, J.; Chapagain, A.; Joshi, L.; Karki, S.; Lo, S.; Paudel, A.; Subedi, P.; Ghimire, S.K. Adapting in the shadow of annapurna: A climate tipping point. *J. Ethnobiol.* **2015**, *35*, 449-471. <https://doi.org/10.2993/0278-0771-35.3.449>.
- Larsen, P.H.; Goldsmith, S.; Smith, O.; Wilson, M.L.; Strzepek, K.; Chinowsky, P.; Saylor, B. Estimating future costs for Alaska public infrastructure at risk from climate change. *Global Environ. Chang.* **2008**, *18*, 442-457. <https://doi.org/10.1016/j.gloenvcha.2008.03.005>.
- Ma, W.; Cheng, G.; Wu, Q. Construction on permafrost foundations: Lessons learned from the Qinghai-Tibet railroad. *Cold Reg. Sci. Technol.* **2009**, *59*, 3-11. <https://doi.org/10.1016/j.coldregions.2009.07.007>.
- Mcneeley, S.M. Sustainable climate change adaptation in Indian country. *Weather Clim.*

- Soc. **2017**, 9, 393-404. <https://doi.org/10.1175/WCAS-D-16-0121.1>.
- Milner, A.M.; Khamis, K.; Battin, T.J.; Brittain, J.E.; Barrand, N.E.; Füreder, L.; Cauvy-Fraunié, S.; Gíslason, G.M.; Jacobsen, D.; Hannah, D.M.; Hodson, A.J.; Hood, E.; Lencioni, V.; Ólafsson, J.S.; Robinson, C.T.; Tranter, M.; Brown, L.E.; Brown, L.E. Glacier shrinkage driving global changes in downstream systems. *P. Natl. Acad. Sci. USA*. **2017**, 114, 9770-9778. <https://doi.org/10.1073/pnas.1619807114>.
- Nothiger, C.; Elsasser, H. Natural hazards and tourism: New findings on the European Alps. *Mt. Res. Dev.* **2004**, 24, 24-27. <https://doi.org/10.2307/3674461>.
- Oliversmith, A. The yungay avalanche of 1970: Anthropological perspectives on disaster and social change. *Disasters* **1979**, 3, 95-101. <https://doi.org/10.1111/j.1467-7717.1979.tb00205.x>.
- Phillips, M.; Margreth, S. Effects of ground temperature and slope deformation on the service life of snow-supporting structures in mountain permafrost: Wisse Schijen, Randa, Swiss Alps. In: *Proceedings of the 9th International Conference on Permafrost*, Fairbanks, Alaska. 1990.
- Raoul, K. Can glacial retreat lead to migration? A critical discussion of the impact of glacier shrinkage upon population mobility in the Bolivian Andes. *Popul. Environ.* **2015**, 36, 480-496. <https://doi.org/10.1007/s11111-014-0226-z>.
- Rhoades, R.E.; Zapata-Rios, X.; Aragundy, J. Mama cotacachi: History, local perceptions, and social impacts of climate change and glacier retreat in the Ecuadorian Andes. In: *Darkening Peaks: Glacier retreat, science, and society*. University of California Press, Berkeley. 2007.
- Shi, G.Q.; Zhang, Y.Z.; Zhao, S.Y.; Zhang, L.X.; Sun, B. Analysis of high-speed railway roadbed settlement in seasonally frozen regions. *International Conference on Civil, Architectural and Hydraulic Engineering (ICCAHE)*. Trans Tech Publications Ltd. 2012. <https://doi.org/10.4028/www.scientific.net/AMM.204-208.1740>.
- Tschakert, P.; Ellis, N.R.; Anderson, C.; Kelly, A.; Obeng, J. One thousand ways to experience loss: A systematic analysis of climate-related intangible harm from around the world. *Global Environ. Chang.* **2019**, 55, 58-72. <https://doi.org/10.1016/j.gloenvcha.2018.11.006>.
- United Nations Educational, Scientific And Cultural Organisation (UNESCO). Operational guidelines for the implementation of the world heritage convention. 2012.
- Urban, M.; Forkel, M.; Eberle, J.; Hüttich, C.; Schmullius, C.; Herold, M. Pan-Arctic climate and land cover trends derived from multi-variate and multi-scale analyses (1981-2012). *Remote Sens.* **2014**, 6, 2296-2316. <https://doi.org/10.3390/rs6032296>.
- Vincent, W.F.; Lemay, M.; Allard, M.; Wolfe, B.B. Adapting to permafrost change: A science framework. *Eos Trans. Am. Geophys. Union* **2013**, 94, 373-375. <https://doi.org/10.1002/2013EO420002>.
- Kuznetsova, E.P.; Walker, D.A.S.; Kofinas, G.; Reynolds, M.; Shiklomanov, N. Rapid Arctic transitions due to infrastructure and climate (RATIC): A contribution to ICARP III. *Alaska Geobotany Center, University of Alaska Fairbanks*, **2016**, 1221-1224. <https://doi.org/10.13140/RG.2.1.4089.0006>.
- Wang, S.; Niu, F.; Chen, J.; Dong, Y. Permafrost research in china related to express highway construction. *Permafrost Periglac.* **2020**, 31, 406-416.

<https://doi.org/10.1002/ppp.2053>.

- Woo, M.; Young, K.L. Disappearing semi-permanent snow in the high Arctic and its consequences. *J Glaciol.* **2014**, *60*, 192-200. <https://doi.org/10.3189/2014JG13J150>.
- Wrathall, D.J.; Bury, J.; Carey, M.; Mark, B.; McKenzie, J.; Young, K.; Baraer, M.; Rampini, C. Migration amidst climate rigidity traps: Resource politics and social-ecological possibilism in Honduras and Peru. *Ann. Assoc. Am. Geogr. Annals.* **2014**, *104*, 292-304. <https://doi.org/10.1080/00045608.2013.873326>.

## **Goal 12. Ensure sustainable consumption and production patterns**

- Denning, A. From sublime landscapes to "white gold": How skiing transformed the alps after 1930. *Environ. Hist.* **2014**, *19*, 78-108. <https://doi.org/10.1093/envhis/emt105>.
- Barnett, T.; Adam, J.C.; Lettenmaier, D.P. Potential impacts of a warming climate on water availability in snow-dominated regions. *Nature* **2005**, *438*, 303-309. <https://doi.org/10.1038/nature04141>.
- Barrett, K.; Bosak, K. The role of place in adapting to climate change: A case study from Ladakh, Western Himalayas. *Sustainability* **2018**, *10*, 898. <https://doi.org/10.3390/su10040898>.
- Becken, S.; Lama, A.K.; Espiner, S. The cultural context of climate change impacts: Perceptions among community members in the Annapurna Conservation Area, Nepal. *Environ. Dev.* **2013**, *8*, 22-37. <https://doi.org/10.1016/j.envdev.2013.05.007>.
- Biemans, H.; Siderius, C.; Lutz, A.F.; Nepal, S.; Ahmad, B.; Hassan, T.; Bloh, W.V.; Wijngaard, R.R.; Wester, P.; Shrestha, A.B.; Immerzeel, W.W. Importance of snow and glacier meltwater for agriculture on the Indo-Gangetic Plain. *Nat. Sustain.* **2019**, *2*, 594-601. <https://doi.org/10.1038/s41893-019-0305-3>.
- Blair, L. Factoring climate change into recreation investment decisions: evidence from Hatcher's Pass, Alaska: Symposium of University Research and Creative Expression (SOURCE). 2015.
- Braun, M.; Fournier, E. Adaptation case studies in the energy sector-overcoming barriers to adaptation, report presented to climate change impacts and adaptation division. *Nat. Resour. Canada.* 2016.
- Denning, A. From sublime landscapes to "white gold": How skiing transformed the alps after 1930. *Environ. Hist.* **2014**, *19*, 78-108. <https://doi.org/10.1093/envhis/emt105>.
- Douglas, T.A.; Loseto, L.L.; Macdonald, R.W.; Outridge, P.; Dommergue, A.; Poulain, A.; Amyot, M.; Barkay, T.; Berg, T.; Chételat, J.; Constant, P.; Evans, M.; Ferrari, C.; Gantner, N.; Johnson, M.S.; Kirk, J.; Kroer, N.; Larose, C.; Lean, D.; Nielsen, T.G.; Poissant, L.; Rognerud, S.; Skov, H.; Sørensen, S.; Wang, F.; Wilson, S.; Zdanowicz, C.M. The fate of mercury in Arctic terrestrial and aquatic ecosystems, a review. *Environ. Chem.* **2012**, *9*, 321-355. <http://dx.doi.org/10.1071/EN11140>.
- Guo, D.; Wang, H. CMIP5 permafrost degradation projection: A comparison among different regions. *J Geophys. Res.* **2016**, *121*, 4499-4517. <https://doi.org/10.1002/2015JD024108>.
- Hagenstad, M.; Burakowski, E.; Hill, R. The economic contributions of winter sports in a changing climate. Hagenstad Consulting, Inc, USA, **2018**, 80.



- Hamududu, B.H.; Killingtveit, A. Assessing climate change impacts on global hydropower. *Energies* **2012**, *5*, 305-322. <https://doi.org/10.3390/en5020305>.
- Hoegh-Guldberg, O.; Jacob, D.; Bindi, M.; Brown, S.; Camilloni, I.; Diedhiou, A.; Djalante, R.; Ebi, K.; Engelbrecht, F.; Guiot, J.; Hijikata, Y.; Mehrotra, S.; Payne, A.; Seneviratne, S.I.; Thomas, A.; Warren, R.; Zhou, G.; Halim, S.A.; Achlatis, M.; Alexander, L.V.; Allen, M.; Berry, P.; Boyer, C.; Byers, E.; Brilli, L.; Buckeridge, M.; Cheung, W.; Craig, M.; Ellis, N.; Evans, J.; Fischer, H.; Fraedrich, K.; Fuss, S.; Ganase, A.; Gattuso, J.P.; Greve, P.; Bolaños, T.G.; Hanasaki, N.; Hasegawa, T.; Hayes, K.; Hirsch, A.; Jones, C.; Jung, T.; Kanninen, M.; Krinner, G.; Lawrence, D.; Lenton, T.; Ley, D.; Liverman, D.; Mahowald, N.; McInnes, K.; Meissner, K.J.; Millar, R.; Mintenbeck, K.; Mitchell, D.; Mix, A.C.; Notz, D.; Nurse, L.; Okem, A.; Olsson, L.; Oppenheimer, M.; Paz, S.; Petersen, J.; Petzold, J.; Preuschmann, S.; Rahman, M.F.; Rogelj, J.; Scheffele, H.; Schleussner, C.F.; Scott, D.; Séférian, R.; Sillmann, J.; Singh, C.; Slade, R.; Stephenson, K.; Stephenson, T.; Sylla, M.B.; Tebboth, M.; Tschakert, P.; Vautard, R.; Wartenburger, R.; Wehner, M.; Weyer, N.M.; Whyte, F.; Yohe, G.; Zhang, X.; Zougmore, R.B. Impacts of 1.5°C global warming on natural and human systems. Global Warming of 1.5°C. An IPCC Special Report. IPCC Secretariat, In Press. **2018**, 175-311. <http://hdl.handle.net/10138/311749>.
- International Hydropower Association (IHA). Hydropower status report 2018, 2018.
- International Hydropower Association (IHA). Advancing sustainable hydropower: Annual report 2020-2021, 2020.
- IPCC. Climate change 2014 impacts, adaptation and vulnerability: Part A: Global and sectoral aspects. Cambridge University Press, Cambridge. 2014a.
- IPCC. Climate change 2014: Mitigation of climate change. Cambridge University Press, Cambridge. 2014b.
- IPCC. Summary for policy makers. Climate change 2014: Impacts, adaptation, and vulnerability. Part A: Global and sectoral aspects. Cambridge University Press, Cambridge. 2014c.
- IPCC. Special report on the ocean and cryosphere in a changing climate (SROCC). IPCC Intergovernmental Panel on Climate Change: Geneva, Switzerland. 2019.
- IPCC, Special report on global warming of 1.5°C. Cambridge University Press, Cambridge. 2018.
- Langford, H.; Hodson, A.; Banwart, S.; Bøggild, C. The microstructure and biogeochemistry of Arctic cryoconite granules. *Ann. Glaciol.* **2010**, *51*, 87-94. <https://doi.org/10.3189/172756411795932083>.
- Nüsser, M.; Baghel, R. Local knowledge and global concerns: Artificial glaciers as a focus of environmental knowledge and development interventions. In: *Ethnic and cultural dimensions of knowledge*. Springer, Cham. 2016. [https://doi.org/10.1007/978-3-319-21900-4\\_9](https://doi.org/10.1007/978-3-319-21900-4_9).
- Nuesser, M.; Schmidt, S. Nanga parbat revisited: Evolution and dynamics of sociohydrological interactions in the Northwestern Himalaya. *Ann. Am. Assoc. Geogr.* **2017**, *107*, 403-415. <https://doi.org/10.1080/24694452.2016.1235495>.
- Nuesser, M.; Dame, J.; Kraus, B.; Baghel, R.; Schmidt, S. Socio-hydrology of “artificial glaciers” in Ladakh, India: Assessing adaptive strategies in a changing cryosphere.

- Reg. Environ. Change **2019**, *19*, 1327-1337. <https://doi.org/10.1007/s10113-018-1372-0>.
- Qin, Y.; Abatzoglou, J.T.; Siebert, S.; Huning, L.S.; AghaKouchak, A.; Mankin, J.S.; Hong, C.; Tong, D.; Davis, S.J.; Mueller, N.D. Agricultural risks from changing snowmelt. *Nat. Clim. Change* **2020**, *10*, 459-465. <https://doi.org/10.1038/s41558-020-0746-8>.
- Rasul, G.; Molden, D. The global social and economic consequences of mountain cryospheric change. *Front. Environ. Sci.* **2019**, *7*, 91. <https://doi.org/10.3389/fenvs.2019.00091>.
- Serdeczny, O. Non-economic loss and damage and the warsaw international mechanism. In: *Loss and damage from climate change: Concepts, methods and policy options*. Springer International Publishing, Cham, Switzerland, 2019.
- Scott, D.; Steiger, R.; Rutty, M.; Fang, Y. The changing geography of the winter olympic and paralympic games in a warmer world. *Curr. Issues Tour.* **2018**, *22*, 1301-1311. <https://doi.org/10.1080/13683500.2018.1436161>.
- Smadja, J.; Aubriot, O.; Puschiasis, O.; Duplan, T.; Grimaldi, J.; Hugonnet, M.; Buchheit, P. Climate change and water resources in the Himalayas. *Rev. Geogr. Alp.* **2015**, 103-2. <https://doi.org/10.4000/rga.2910>.
- Steiger, R.; Scott, D.; Abegg, B.; Pons, M.; Aall, C. A critical review of climate change risk for ski tourism. *Curr. Issues Tour.* **2019**, *22*, 1343-1379. <https://doi.org/10.1080/13683500.2017.1410110>.
- Stewart, E.J.; Wilson, J.; Espiner, S.; Purdie, H.; Lemieux, C.; Dawson, J. Implications of climate change for glacier tourism. *Tourism Geogr.* **2016**, *18*, 377-398. <https://doi.org/10.1080/14616688.2016.1198416>.
- United Nations Framework Convention on Climate Change (UNFCCC) secretariat 2014: Subsidiary body for scientific and technological advice. Forty-first session, Report of the executive committee of the Warsaw international mechanism for loss and damage associated with climate change impacts. 2014.
- Vanat, L. International report on snow & mountain tourism - overview of the key industry figures for ski resorts. Geneva, Switzerland, 2018.
- Vanat, L. International report on snow & mountain tourism - overview of the key industry figures for ski resorts. Geneva, Switzerland, 2020.
- Wang, S.; He, Y.; Song, X. Impacts of climate warming on alpine glacier tourism and adaptive measures: A case study of baishui glacier No.1 in yulong snow mountain, Southwestern China. *J. Earth Sci.* **2010**, *21*, 166-178. <https://doi.org/10.1007/s12583-010-0015-2>.
- Xiao, C.; Su, B.; Wang, X.; Qin, D. Cascading risks to the deterioration in cryospheric functions and services. *Chinese Sci. Bull.* **2019**, *64*, 1975-1984. <https://doi.org/10.1360/N972018-01314>.
- Yang, N.F.; Niu, F.; MA, L. Current status and reflection on solid waste disposal in permafrost regions. *China Safety Science Journal* **2007**, *17*, 148-152.
- Yu, W.; Han, F.; Liu, W.; Harris, S.A. Geohazards and thermal regime analysis of oil pipeline along the Qinghai-Tibet plateau engineering corridor. *Nat. Hazards* **2016**, *83*, 193-209. <https://doi.org/10.1007/s11069-016-2308-y>.
- Zaharescu, D.G.; Hooda, P.S.; Burghilea, C.I.; Polyakov, V.; Palanca-Soler, A. Climate

change enhances the mobilisation of naturally occurring metals in high altitude environments. *Sci. Total Environ.* **2016**, *560*, 73-81. <https://doi.org/10.1016/j.scitotenv.2016.04.002>.

### **Goal 13. Take urgent action to combat climate change and its impacts**

- Arctic monitoring and assessment programme (AMAP). AMAP assessment 2013: Arctic ocean acidification. School of Biological and Marine Sciences, Oslo, Norway. 2013.
- Arctic monitoring and assessment programme (AMAP). Snow, water, ice and permafrost in the Arctic (SWIPA) 2017. School of Biological and Marine Sciences (AMAP), Oslo, Norway. 2017.
- Brugger, J.; Dunbar, K.W.; Jurt, C.; Orlove, B. Climates of anxiety: Comparing experience of glacier retreat across three mountain regions. *Emot. Space. Soc.* **2013**, *6*, 4-13. <https://doi.org/10.1016/j.emospa.2012.05.001>.
- Duvillard, P.A.; Ravanel, L.; Marcer, M.; Schoeneich, P. Recent evolution of damage to infrastructure on permafrost in the French Alps. *Reg. Environ. Change* **2019**, *19*, 1281-1293. <https://doi.org/10.1007/s10113-019-01465-z>.
- Mark, B.G.; Bury, J.; McKenzie, J.M.; French, A.; Baraer, M. Climate change and tropical Andean glacier recession: Evaluating hydrologic changes and livelihood vulnerability in the Cordillera Blanca, Peru. *Ann. Am. Assoc. Geogr.* **2010**, *100*, 794-805.
- Hussain, A.; Rasul, G.; Mahapatra, B.; Wahid, S.; Tuladhar, S. Climate change-induced hazards and local adaptations in agriculture: A study from Koshi River Basin, Nepal. *Nat. Hazards* **2018**, *91*, 1-19. <https://doi.org/10.1007/s11069-018-3187-1>.
- Huss, M. Hock, R. Global-scale hydrological response to future glacier mass loss. *Nat. Clim. Change* **2018**, *8*, 135-140. <https://doi.org/10.1038/s41558-017-0049-x>.
- IPCC. Climate change 2014: Mitigation of climate change. Cambridge University Press, Cambridge, 2014.
- IPCC. Special report on the ocean and cryosphere in a changing climate (SROCC). IPCC Intergovernmental Panel on Climate Change: Geneva, Switzerland.
- IPCC. Special report on global warming of 1.5°C. Cambridge University Press, Cambridge, 2018.
- IPCC. Summary for policy makers. Climate change 2014: Impacts, adaptation, and vulnerability. Part A: Global and sectoral aspects. Cambridge University Press, Cambridge, 2014.
- Lepage, J.M. Doré, G. Fortier, F. Experimentation of mitigation techniques to reduce the effects of permafrost degradation on transportation infrastructures at Beaver Creek experimental road site (Alaska Highway, Yukon). GEO2010, 63rd Canadian Geotechnical Conference and 6th Canadian Permafrost Conference, Calgary. 2010.
- Mark, B.G.; Bury, J.; McKenzie, J.M.; French, A.; Baraer, M. Climate change and tropical Andean glacier recession: Evaluating hydrologic changes and livelihood vulnerability in the Cordillera Blanca, Peru. *Ann. Am. Assoc. Geogr.* **2010**, *100*, 794-805.
- Matthes, H.; Rinke, A.; Dethloff, K. Recent changes in Arctic temperature extremes: warm and cold spells during winter and summer. *Environ. Res. Lett.* **2015**, *10*, 114020.

- <https://doi.org/10.1088/1748-9326/10/11/114020>.
- Mu, C.; Wu, X.; Zhao, Q.; Smoak, J.M.; Yang, Y.; Hu, L.; Zhong, W.; Liu, G.; Xu, H.; Zhang, T. Relict mountain permafrost area (Loess Plateau, China) exhibits high ecosystem respiration rates and accelerating rates in response to warming. *J Geophys. Res.* 2017, 122, 2580-2592. <https://doi.org/10.1002/2017JG004060>.
- Phillips, M.; Margreth, S. Effects of ground temperature and slope deformation on the service life of snow-supporting structures in mountain permafrost. *Proceedings of the 9th International Conference on Permafrost Wisse Schijen, Randa, Swiss Alps.* 2008.
- Pritchard, H.D. Asia's shrinking glaciers protect large populations from drought stress. *Nature* 2019, 569, 649-654. <https://doi.org/10.1038/s41586-019-1240-1>.
- Rasmussen, B.M. Unsettling times: Living with the changing horizons of the Peruvian Andes. *Lat. Am. Perspect.* 2015, 43, 73-86. <https://doi.org/10.1177/0094582X16637867>.
- Schirpke, U.; Timmermann, F.; Tappeiner, U.; Tasser, E. Cultural ecosystem services of mountain regions: Modelling the aesthetic value. *Ecol. Indic.* 2016, 69, 78-90. <https://doi.org/10.1016/j.ecolind.2016.04.001>.
- Wu, W.; Lan, C.; Lo, M.; Reager, J.T.; Famiglietti, J.S. Increases in the annual range of soil water storage at northern middle and high latitudes under global warming. *Geophys. Res. Lett.* 2015, 42, 3903-3910. <https://doi.org/10.1002/2015GL064110>.
- Yang, Y.; Hopping, K.A.; Wang, G.; Chen, J.; Peng, A.; Klein, J.A. Permafrost and drought regulate vulnerability of Tibetan Plateau grasslands to warming. *Ecosphere* 2018, 9, e02233. <https://doi.org/10.1002/ecs2.2233>.
- Zhang, J.; Wang, Y.; Ji, Y.; Yan, D. Melting and shrinkage of cryosphere in Tibet and its impact on the ecological environment. *J. Arid Land.* 2011, 3, 292-299. <https://doi.org/10.3724/SP.J.1227.2011.00292>.

#### **Goal 14. Conserve and sustainably use the oceans, seas and marine resources for sustainable development**

- Arctic monitoring and assessment programme (AMAP). AMAP assessment 2013: Arctic ocean acidification. School of Biological and Marine Sciences, Oslo, Norway; 2013.
- Arctic monitoring and assessment programme (AMAP). Snow, water, ice and permafrost in the Arctic (SWIPA) 2017. School of Biological and Marine Sciences, Oslo, Norway; 2017.
- Ask, J.; Karlsson, J.; Persson, L.; Ask, P.; Byström, P.; Jansson, M. Terrestrial organic matter and light penetration: Effects on bacterial and primary production in lakes. *Limnol. Oceanogr.* 2009, 54, 2034-2040. <https://doi.org/10.4319/lo.2009.54.6.2034>.
- Douglas, T.A.; Loseto, L.L.; Macdonald, R.W.; Outridge, P.; Dommergue, A.; Poulain, A.; Amyot, M.; Barkay, T.; Berg, T.; Chételat, J.; Constant, P.; Evans, M.; Ferrari, C.; Gantner, N.; Johnson, M.S.; Kirk, J.; Kroer, N.; Larose, C.; Lean, D.; Nielsen, T.G.; Poissant, L.; Rognerud, S.; Skov, H.; Sørensen, S.; Wang, F.; Wilson, S.; Zdanowicz, C.M. The fate of mercury in Arctic terrestrial and aquatic ecosystems, a review.

- Environ. Chem. **2012**, 9, 321-355. <http://dx.doi.org/10.1071/EN11140>.
- Food and Agriculture Organization of the United Nations (FAO). Impacts of climate change on fisheries and aquaculture: synthesis of current knowledge, adaptation and mitigation options. 2018.
- Greene, C.H.; Pershing, A.J.; Cronin, T.M.; Ceci, N. Arctic climate change and its impacts on the ecology of the north atlantic. *Ecology* **2008**, 89, 24-38. <https://doi.org/10.1890/07-0550.1>.
- Gobler, C.J. Climate change and harmful algal blooms: Insights and perspective. *Harmful Algae* **2020**, 91, 101731. <https://doi.org/10.1016/j.hal.2019.101731>.
- Hawkings, J.; Wadham, J.; Tranter, M.; Telling, J.; Bagshaw, E.; Beaton, A.; Simmons, S.L.; Chandler, D.; Tedstone, A.; Nienow, P. The Greenland ice sheet as a hot spot of phosphorus weathering and export in the Arctic. *Global Biogeochem. Cy.* **2016**, 30, 191-210. <https://doi.org/10.1002/2015GB005237>.
- IPCC. Special report on the ocean and cryosphere in a changing climate (SROCC). IPCC Intergovernmental Panel on Climate Change: Geneva, Switzerland, 2019.
- Michael, L. Melting glacier threatens to shove a mighty river off course. *Nature*. **2021**.
- Oschlies, A. A committed fourfold increase in ocean oxygen loss. *Nat. Commun.* **2021**, 12, 2307. <https://doi.org/10.1038/s41467-021-22584-4>.
- Peck, M.; Pinnegar, J. Impacts of climate change on fisheries and aquaculture synthesis of current knowledge, adaptation and mitigation options. 2018. <https://www.researchgate.net/publication/329377568>.
- Peterson, B.J.; Holmes, R.M.; McClelland, J.W.; Vörösmarty, C.J.; Lammers, R.B.; Shiklomanov, A.I.; Shiklomanov, I.A.; Rahmstorf, S. Increasing river discharge to the Arctic ocean. *Science* **2002**, 298, 2171-2173. <https://doi.org/10.1126/science.1077445>.
- Rautio, M.; Mariash, H.; Forsström, L. Seasonal shifts between autochthonous and allochthonous carbon contributions to zooplankton diets in a subarctic lake. *Limnol. Oceanogr.* **2011**, 56, 1513-1524. <https://doi.org/10.4319/lo.2011.56.4.1513>.
- Sun, X.; Zhang, Q.; Kang, S.; Guo, J.; Li, X.; Yu, Z.; Zhang, G.; Qu, D.; Huang, J.; Cong, Z.; Wu, G. Mercury speciation and distribution in a glacierized mountain environment and their relevance to environmental risks in the inland Tibetan Plateau. *Sci. Total Environ.* **2018**, 631, 270-278. <https://doi.org/10.1016/j.scitotenv.2018.03.012>.
- Sun, X.; Wang, K.; Kang, S.; Guo, J.; Zhang, G.; Huang, J.; Cong, Z.; Sun, S.; Zhang, Q. The role of melting alpine glaciers in mercury export and transport: An intensive sampling campaign in the Qugaqie basin, inland Tibetan plateau. *Environ. Pollut.* **2017**, 220, 936-945. <https://doi.org/10.1016/j.envpol.2016.10.079>.
- Spencer, R.; Aiken, G.R.; Butler, K.D.; Dornblaser, M.M.; Striegl, R.G.; Hernes, P.J. Utilizing chromophoric dissolved organic matter measurements to derive export and reactivity of dissolved organic carbon exported to the Arctic ocean: A case study of the Yukon river, Alaska. *Geophys. Res. Lett.* **2009**, 36. <https://doi.org/10.1029/2008GL036831>.
- Wassmann, P. Arctic marine ecosystems in an era of rapid climate change. *Prog. Oceanogr.* **2011**, 90, 1-17. <https://doi.org/10.1016/j.pocean.2011.02.002>.



Wassmann, P.; Duarte, C.M.; Agusti, S.; Sejr, M.K. Footprints of climate change in the Arctic marine ecosystem. *Glob Chang Biol.* **2011**, *17*, 1235-1249. <https://doi.org/10.1111/j.1365-2486.2010.02311.x>.

**Goal 15. Protect, restore and promote sustainable use of terrestrial ecosystems, sustainably manage forests, combat desertification, and halt and reverse land degradation and halt biodiversity loss**

Allison, E.A. The spiritual significance of glaciers in an age of climate change. *Wires. Clim. Change* **2015**, *6*, 493-508. <https://doi.org/10.1002/wcc.354>.

Bjorkman, A.D.; Elmendorf, S.C.; Beamish, A.L.; Vellend, M.; Henry, G.H. Contrasting effects of warming and increased snowfall on Arctic tundra plant phenology over the past two decades. *Glob. Chang. Biol.* **2015**, *21*, 4651-4661. <https://doi.org/10.1111/gcb.13051>.

Blok, D.; Weijers, S.; Welker, J.M.; Cooper, E.J.; Michelsen, A.; Löffler, J.; Elberling, B. Deepened winter snow increases stem growth and alters stem delta C-13 and delta N-15 in evergreen dwarf shrub *Cassiope tetragona* in high-arctic Svalbard tundra. *Environ. Res. Lett.* **2015**, *10*, 044008. <https://doi.org/10.1088/1748-9326/10/4/044008>.

Brugger, J.; Dunbar, K.W.; Jurt, C.; Orlove, B. Climates of anxiety: Comparing experience of glacier retreat across three mountain regions. *Emot. Space. Soc.* **2013**, *6*, 4-13. <https://doi.org/10.1016/j.emospa.2012.05.001>.

Cooper, E.J. Warmer shorter winters disrupt Arctic terrestrial ecosystems. *Annu. Rev. Ecol. Evol. Syst.* **2014**, *45*, 271-295. <https://doi.org/10.1146/annurev-ecolsys-120213-091620>.

Dhakar, K. Pandey, A. Microbial ecology from the Himalayan cryosphere perspective. *Microorganisms* **2020**, *8*, 257. <https://doi.org/10.3390/microorganisms8020257>.

Dobrowski, S.Z.; Parks, S.A. Climate change velocity underestimates climate change exposure in mountainous regions. *Nat. Commun.* **2016**, *7*, 12349. <https://doi.org/10.1038/ncomms12349>.

Fauteux, D.; Gauthier, G.; Berteaux, D. Seasonal demography of a cyclic lemming population in the Canadian Arctic. *J. Anim. Ecol.* **2015**, *84*, 1412-1422. <https://doi.org/10.1111/1365-2656.12385>.

Gagne, K.; Rasmussen, M.B.; Orlove, B. Glaciers and society: Attributions, perceptions, and valuations. *Wires. Clim. Change* **2014**, *5*, 793-808. <https://doi.org/10.1002/wcc.315>.

Gao, Y.; Li, X.; Leung, L.R.; Chen, D.; Xu, J. Aridity changes in the Tibetan Plateau in a warming climate. *Environ. Res. Lett.* **2015**, *10*, 034013. <https://doi.org/10.1088/1748-9326/10/3/034013>.

Garavaglia, V.; Diolaiuti, G.; Smiraglia, C.; Pasquale, V.; Pelfini, M. Evaluating tourist perception of environmental changes as a contribution to managing natural resources in glacierized areas: a case study of the Forni glacier (Stelvio National Park, Italian Alps). *Environ. Manage.* **2012**, *50*, 1125-1138. <https://doi.org/10.1007/s00267-012-9948-9>.

Garavaglia, V.; Pelfini, M. Glacial geomorphosites and related landforms: A proposal for a dendrogeomorphological approach and educational trails. *Geoheritage* **2011**, *3*, 15-25. <https://doi.org/10.1007/s12371-010-0027-4>.

- Gentili, R.; Baroni, C.; Caccianiga, M.; Armiraglio, S.; Ghiani, A.; Citterio, S. Potential warm-stage microrefugia for alpine plants: Feedback between geomorphological and biological processes. *Ecol. Complex.* **2015**, *21*, 87-99. <https://doi.org/10.1016/j.ecocom.2014.11.006>.
- Goncharova, O.Y.; Matyshak, G.V.; Epstein, H.E.; Sefilian, A.R.; Bobrik, A.A. Influence of snow cover on soil temperatures: Meso-and micro-scale topographic effects (a case study from the northern West Siberia discontinuous permafrost zone). *Catena* **2019**, *183*, 104224. <https://doi.org/10.1016/j.catena.2019.104224>.
- Giersch, J.; Jordan, S.; Luikart, G.; Jones, L.A.; Hauer, F.R.; Muhlfeld, C.C. Climate-induced range contraction of a rare alpine aquatic invertebrate. *Freshw. Biol.* **2015**, *34*, 53-65. <https://doi.org/10.1086/679490>.
- Giersch, J.; Hotaling, S.; Kovach, R.P.; Jones, L.A.; Muhlfeld, C.C. Climate-induced glacier and snow loss imperils alpine stream insects. *Glob. Chang. Biol.* **2017**, *23*, 2577-2589. <https://doi.org/10.1111/gcb.13565>.
- Harpold, A.A.; Molotch, N.P. Sensitivity of soil water availability to changing snowmelt timing in the western U.S. *Geophys. Res. Lett.* **2015**, *42*, 8011-8020. <https://doi.org/10.1002/2015GL065855>.
- Hawkings, J.R.; Wadham, J.L.; Tranter, M.; Raiswell, R.; Benning, L.G.; Statham, P.J.; Tedstone, A.; Nienow, P.; Lee, K.; Telling, J. Ice sheets as a significant source of highly reactive nanoparticulate iron to the oceans. *Nat. Commun.* **2014**, *5*, 3929-3929. <https://doi.org/10.1038/ncomms4929>.
- Hoegh-Guldberg, O.; Jacob, D.; Bindi, M.; Brown, S.; Camilloni, I.; Diedhiou, A.; Djalante, R.; Ebi, K.; Engelbrecht, F.; Guiot, J.; Hijioka, Y.; Mehrotra, S.; Payne, A.; Seneviratne, S.I.; Thomas, A.; Warren, R.; Zhou, G.; Halim, S.A.; Achlatis, M.; Alexander, L.V.; Allen, M.; Berry, P.; Boyer, C.; Byers, E.; Brilli, L.; Buckeridge, M.; Cheung, W.; Craig, M.; Ellis, N.; Evans, J.; Fischer, H.; Fraedrich, K.; Fuss, S.; Ganase, A.; Gattuso, J.P.; Greve, P.; Bolaños, T.G.; Hanasaki, N.; Hasegawa, T.; Hayes, K.; Hirsch, A.; Jones, C.; Jung, T.; Kanninen, M.; Krinner, G.; Lawrence, D.; Lenton, T.; Ley, D.; Liverman, D.; Mahowald, N.; McInnes, K.; Meissner, K.J.; Millar, R.; Mintenbeck, K.; Mitchell, D.; Mix, A.C.; Notz, D.; Nurse, L.; Okem, A.; Olsson, L.; Oppenheimer, M.; Paz, S.; Petersen, J.; Petzold, J.; Preuschmann, S.; Rahman, M.F.; Rogelj, J.; Scheffele, H.; Schleussner, C.F.; Scott, D.; Séférian, R.; Sillmann, J.; Singh, C.; Slade, R.; Stephenson, K.; Stephenson, T.; Sylla, M.B.; Tebboth, M.; Tschakert, P.; Vautard, R.; Wartenburger, R.; Wehner, M.; Weyer, N.M.; Whyte, F.; Yohe, G.; Zhang, X.; Zougmore, R.B. Impacts of 1.5°C global warming on natural and human systems. *Global Warming of 1.5°C. An IPCC Special Report. IPCC Secretariat*, In Press. **2018**, 175-311. <http://hdl.handle.net/10138/311749>.
- IPCC. Special report on the ocean and cryosphere in a changing climate (SROCC). IPCC Intergovernmental Panel on Climate Change: Geneva, Switzerland, 2019.
- Indian Himalayas Climate Adaptation Programme (IHCAP). Mountain and lowland linkages: A climate change perspective in the Himalayas. 2017.
- Ingty, T. High mountain communities and climate change: adaptation, traditional ecological knowledge, and institutions. *Climatic Change* **2017**, *145*, 41-55. <https://doi.org/10.1007/s10584-017-2080-3>.

- Jamir, O. Understanding India-Pakistan water politics since the signing of the Indus water treaty. *Water Policy* **2016**, *18*, 1070-1087. <https://doi.org/10.2166/wp.2016.185>.
- Jian, Z.; Kinzelbach, W.; Cheng, G.; Zhang, W.; He, X.; Ye, B. Monitoring and modeling the influence of snow pack and organic soil on a permafrost active layer, Qinghai-Tibetan Plateau of China. *Cold Reg. Sci. Technol.* **2013a**, *90*, 38-52. <https://doi.org/10.1016/j.coldregions.2013.03.003>.
- Jian, Z.; Kinzelbach, W.; Cheng, G.; Zhang, W.; He, X.; Ye, B. Monitoring and modeling the influence of snow pack and organic soil on a permafrost active layer, Qinghai-Tibetan Plateau of China. *Cold Reg. Sci. Technol.* **2013b**, *91*, 38-52. <https://doi.org/10.1016/j.coldregions.2013.03.003>.
- Kissel, A.M.; Palen, W.J.; Ryan, M.E.; Adams, M.J. Compounding effects of climate change reduce population viability of a montane amphibian. *Ecol. Appl.* **2019**, *29*, 1-12. <https://doi.org/10.1002/eap.1832>.
- Jones, D.B.; Harrison, S.; Anderson, K.; Betts, R.A. Mountain rock glaciers contain globally significant water stores. *Sci. Rep.* **2018**, *8*, 2834-2834. <https://doi.org/10.1038/s41598-018-21244-w>.
- Mills, L.S.; Bragina, E.V.; Kumar, A.V.; Zimova, M.; Lafferty, D. J.; Feltner, J.; Davis, B.M.; Hackländer, K.; Alves, P.C.; Good, J.M.; Melo-Ferreira, J.; Dietz, A.; Abramov, A.V.; Lopatina, N.; Fay, K. Winter color polymorphisms identify global hot spots for evolutionary rescue from climate change. *Science* **2018**, *359*, 1033-1036. <https://doi.org/10.1126/science.aan8097>.
- Milner, A.M.; Khamis, K.; Battin, T.J.; Brittain, J.E.; Barrand, N.E.; Füreder, L.; Cauvy-Fraunié, S.; Gíslason, G.M.; Jacobsen, D.; Hannah, D.M.; Hodson, A.J.; Hood, E.; Lencioni, V.; Ólafsson, J.S.; Robinson, C.T.; Tranter, M.; Brown, L.E.; Brown, L.E. Glacier shrinkage driving global changes in downstream systems. *P. Natl. Acad. Sci. USA.* **2017**, *114*, 9770-9778. <https://doi.org/10.1073/pnas.1619807114>.
- Larsen, P.H. Goldsmith, S.; Smith, O.; Wilson, M.L.; Strzepek, K.; Chinowsky, P.; Saylor, B. Estimating future costs for Alaska public infrastructure at risk from climate change. *Global Environ. Chang.* **2008**, *18*, 442-457. <https://doi.org/10.1016/j.gloenvcha.2008.03.005>.
- Lawson, E.C.; Bhatia, M.P.; Wadham, J.L.; Kujawinski, E.B. Continuous summer export of nitrogen-rich organic matter from the Greenland ice sheet inferred by ultrahigh resolution mass spectrometry. *Environ. Sci. Technol.* **2014**, *48*, 14248-14257. <https://doi.org/10.1021/es501732h>.
- Leffler, A.J.; Welker, J.M. Long-term increases in snow pack elevate leaf N and photosynthesis in *Salix arctica*: responses to a snow fence experiment in the high Arctic of NW Greenland. *Environ. Res. Lett.* **2013**, *8*, 025023. <https://doi.org/10.1088/1748-9326/8/2/025023>.
- Luus, K.; Lin, J.C.; Kelly, R.; Duguay, C.R. Subnivean Arctic and sub-Arctic net ecosystem exchange (NEE) towards representing snow season processes in models of NEE using cryospheric remote sensing. *Prog. Phys. Geog.* **2013**, *37*, 484-515. <https://doi.org/10.1177/0309133313491130>.
- Panetta, A.M.; Stanton, M.L.; Harte, J. Climate warming drives local extinction: Evidence from observation and experimentation. *Sci. Adv.* **2018**, *4*, eaag1819.



- <https://doi.org/10.1126/sciadv.aag1819>.
- Paudel, K.P.; Andersen, P. Assessing rangeland degradation using multi temporal satellite images and grazing pressure surface model in upper Mustang, Trans Himalaya, Nepal. *Remote Sens. Environ.* **2010**, *114*, 1845-1855. <https://doi.org/10.1016/j.rse.2010.03.011>.
- Pritchard, H.D. Asia's shrinking glaciers protect large populations from drought stress. *Nature* **2019**, *569*, 649-654. <https://doi.org/10.1038/s41586-019-1240-1>.
- Rasul, G.; Pasakhala, B.; Mishra, A.; Pant, S. Adaptation to mountain cryosphere change: issues and challenges. *Clim. Dev.* **2020**, *12*, 297-309. <https://doi.org/10.1080/17565529.2019.1617099>.
- Rosvold, J. Perennial ice and snow-covered land as important ecosystems for birds and mammals. *J. Biogeogr.* **2016**, *43*, 3-12. <https://doi.org/10.1111/jbi.12609>.
- Semenchuk, P.; Elberling, B.; Cooper, E.J. Snow cover and extreme winter warming events control flower abundance of some, but not all species in high arctic Svalbard. *Ecol. Evol.* **2019**, *3*, 2586-2599. <https://doi.org/10.1002/ece3.648>.
- Shen, Y.; Shen, Y.; Fink, M.; Kralisch, S.; Chen, Y.; Brenning, A. Trends and variability in streamflow and snowmelt runoff timing in the southern Tianshan mountains. *J. Hydrol.* **2018**, *557*, 173-181. <https://doi.org/10.1016/j.jhydrol.2017.12.035>.
- Stuefer, S.L.; Kane, D.L. Snow retention for increased water supply of shallow Arctic lakes. *Cold Reg. Sci. Tec.* **2016**, *123*, 32-43. <https://doi.org/10.1016/j.coldregions.2015.11.011>.
- Sun, F.; Lyu, Y.; Fu, B.; Hu, J. Hydrological services by mountain ecosystems in Qilian mountain of China: A review. *Chinese Geogr. Sci.* **2016**, *26*, 174-187. <https://doi.org/10.1007/s11769-015-0791-9>.
- Urban, M.; Forkel, M.; Eberle, J.; Hüttich, C.; Schmullius, C.; Herold, M. Pan-Arctic climate and land cover trends derived from multi-variate and multi-scale analyses (1981-2012). *Remote Sens.* **2014**, *6*, 2296-2316. <https://doi.org/10.3390/rs6032296>.
- Wang, S.; Wang, X.; Chen, G.; Yang, Q.; Wang, B.; Ma, Y.; Shen, M. Complex responses of spring alpine vegetation phenology to snow cover dynamics over the Tibetan Plateau, China. *Sci. Total Environ.* **2017**, *593*, 449-461. <https://doi.org/10.1016/j.scitotenv.2017.03.187>.
- Wang, X.; Liu, S.W.; Zhang, J.L. A new look at roles of the cryosphere in sustainable development. *Adv. Clim. Chang. Res.* **2019**, *10*, 124-131. <https://doi.org/10.1016/j.accre.2019.06.005>.
- Wheeler, H.C.; Høye, T.T.; Schmidt, N.M.; Svenning, J.C.; Forchhammer, M.C. Phenological mismatch with abiotic conditions-implications for flowering in Arctic plants. *Ecology* **2015**, *96*, 775-787. <https://doi.org/10.1890/14-0338.1>.
- Wheeler, J.A.; Cortes, A.J.; Sedlacek, J.; Karrenberg, S.; van Kleunen, M.; Wipf, S.; Hoch, G.; Bossdorf, O.; Rixen, C. The snow and the willows: Earlier spring snowmelt reduces performance in the low-lying alpine shrub *Salix herbacea*. *J. Ecol.* **2016**, *104*, 1041-1050. <https://doi.org/10.1111/1365-2745.12579>.
- White, K.S.; Gregovich, D.P.; Levi, T. Projecting the future of an alpine ungulate under climate change scenarios. *Glob. Chang. Biol.* **2018**, *24*, 1136-1149. <https://doi.org/10.1111/gcb.13919>.

- Wilhelm, L.; Singer, G.A.; Fasching, C.; Battin, T.J.; Besemer, K. Microbial biodiversity in glacier-fed streams. *J. ISME* **2013**, *7*, 1651-1660. <https://doi.org/10.1038/ismej.2013.44>.
- Woo, M.; Young, K.L. Disappearing semi-permanent snow in the high Arctic and its consequences. *J. Glaciol.* **2014**, *60*, 192-200. <https://doi.org/10.3189/2014JG13J150>.
- Xiao, C.; Su, B.; Wang, X.; Qin, D. Cascading risks to the deterioration in cryospheric functions and services. *Chinese Sci. Bull.* **2019**, *64*, 1975-1984. <https://doi.org/10.1360/N972018-01314>.
- Xiao, C.; Wang, S.; Qin, D. A preliminary study on cryosphere service function and its value estimation. *Progressus Inquisitiones de Mutatione Climatis* **2016**, *12*, 45-52. <https://doi.org/10.12006/j.issn.1673-1719.2015.146>.
- Yang, Y.; Brown, C.; Yu, W.; Wescoat, J.; Ringler, C. Water governance and adaptation to climate change in the Indus River Basin. *J. Hydrol.* **2014**, *519*, 2527-2537. <https://doi.org/10.1016/j.jhydrol.2014.08.055>.
- Zhang, J.; Wang, Y.; Ji, Y.; Yan, D. Melting and shrinkage of cryosphere in Tibet and its impact on the ecological environment. *J. Arid Land.* **2011**, *3*, 292-299. <https://doi.org/10.3724/SP.J.1227.2011.00292>.
- Zhang, W.; Shen, Y.; Wang, X.; Kang, S.; Mao, W.; Zhong, X. Snow cover controls seasonally frozen ground regime on the southern edge of Altai mountains. *Agric. For. Meteorol.* **2021**, *297*, 108271. <https://doi.org/10.1016/j.agrformet.2020.108271>.
- Zhang, Y.; Lu, Y.; Zhou, Q.; Wu, F. Optimal water allocation scheme based on trade-offs between economic and ecological water demands in the Heihe River Basin of Northwest China. *Sci. Total Environ.* **2020**, *703*, 134958. <https://doi.org/10.1016/j.scitotenv.2019.134958>.
- Zhao, J.Y.; Chen, J.; Wu, Q.B.; Hou, X. Snow cover influences the thermal regime of active layer in Urumqi river source, Tianshan mountains, China. *J. Mt. Sci.-Engl.* **2018**, *15*, 2622-2636. <https://doi.org/10.1007/s11629-018-4856-y>.
